# 1 High number of SARS-CoV-2 persistent infections 2 uncovered through genetic analysis of samples from a 3 large community-based surveillance study

4  
5 Mahan Ghafari<sup>\*1,2</sup>, Matthew Hall<sup>1</sup>, Tanya Golubchik<sup>1,3</sup>, Daniel Ayoubkhani<sup>4,5</sup>, Thomas  
6 House<sup>6</sup>, George MacIntyre-Cockett<sup>1,7</sup>, Helen Fryer<sup>1</sup>, Laura Thomson<sup>1</sup>, Anel Nurtay<sup>1</sup>, David  
7 Buck<sup>7</sup>, Angie Green<sup>7</sup>, Amy Trebes<sup>7</sup>, Paolo Piazza<sup>7</sup>, Lorne J Lonie<sup>7</sup>, Ruth Studley<sup>4</sup>, Emma  
8 Rourke<sup>4</sup>, Darren Smith<sup>8,9</sup>, Matthew Bashton<sup>8,9</sup>, Andrew Nelson<sup>9</sup>, Matthew Crown<sup>8,9</sup>, Clare  
9 McCann<sup>9</sup>, Gregory R Young<sup>8,9</sup>, Rui Andre Nunes dos Santos<sup>9</sup>, Zack Richards<sup>9</sup>, Adnan  
10 Tariq<sup>9</sup>, Roberto Cahuantzi<sup>4</sup>, Wellcome Sanger Institute COVID-19 Surveillance Team<sup>\*\*</sup>,  
11 COVID-19 Infection Survey Group, The COVID-19 Genomics UK (COG-UK) Consortium<sup>++10</sup>,  
12 Jeff Barrett<sup>11</sup>, Christophe Fraser<sup>1,7,11</sup>, David Bonsall<sup>1,7,16</sup>, Ann Sarah Walker<sup>12,13,14,15</sup>, Katrina  
13 Lythgoe<sup>1,2</sup>

14

15 \*Corresponding author: [mahan.ghafari@ndm.ox.ac.uk](mailto:mahan.ghafari@ndm.ox.ac.uk)

16

17 <sup>1</sup>Big Data Institute, Nuffield Department of Medicine, University of Oxford, Old Road Campus, Oxford  
18 OX3 7LF, UK.

19 <sup>2</sup>Department of Biology, University of Oxford, Oxford OX1 3SZ, UK

20 <sup>3</sup>Sydney Infectious Diseases Institute (Sydney ID), School of Medical Sciences, Faculty of

21 <sup>4</sup>Office for National Statistics, Newport, UK

22 <sup>5</sup>Medicine and Health, University of Sydney

23 <sup>6</sup>Leicester Real World Evidence Unit, Diabetes Research Centre, University of Leicester, Leicester,  
24 UK

25 <sup>7</sup>Department of Mathematics, University of Manchester, Manchester, M13 9PL, UK

26 <sup>8</sup>Wellcome Centre for Human Genetics, Nuffield Department of Medicine, NIHR Biomedical Research  
27 Centre, University of Oxford, Old Road Campus, Oxford OX3 7BN, UK.

28 <sup>9</sup>The Hub for Biotechnology in the Built Environment, Department of Applied Sciences, Faculty of  
29 Health and Life Sciences, Northumbria University, Newcastle upon Tyne, NE1 8ST, UK

30 <sup>10</sup>Department of Applied Sciences, Faculty of Health and Life Sciences, Northumbria University,  
31 Newcastle upon Tyne, NE1 8ST, UK

32 <sup>11</sup><https://www.cogconsortium.uk>

33 <sup>12</sup>Wellcome Sanger Institute, Cambridge CB10 1SA, UK

34 <sup>13</sup>Nuffield Department of Medicine, University of Oxford, Oxford, UK

35 <sup>14</sup>The National Institute for Health Research Health Protection Research Unit in Healthcare  
36 Associated Infections and Antimicrobial Resistance at the University of Oxford, Oxford, UK.

37 <sup>15</sup>The National Institute for Health Research Oxford Biomedical Research Centre, University of  
38 Oxford, Oxford, UK

39 <sup>16</sup>MRC Clinical Trials Unit at UCL, UCL, London, UK

40 <sup>17</sup>Oxford University Hospitals NHS Foundation Trust, John Radcliffe Hospital, Headington, Oxford  
41 OX3 9DU, UK

42

43 <sup>\*\*</sup>The full list of names is available at <https://www.sanger.ac.uk/project/wellcome-sanger-institute-covid-19-surveillance-team/>

44 <sup>++</sup>The full list of names and affiliations of COG-UK members is provided in the appendix

45

## 46 **Abstract**

47

48 Persistent severe acute respiratory syndrome coronavirus 2 (SARS-CoV-2)  
49 infections may act as viral reservoirs that could seed future outbreaks <sup>1-5</sup>, give rise to  
50 highly divergent lineages <sup>6-8</sup>, and contribute to cases with post-acute Coronavirus  
51 disease 2019 (COVID-19) sequelae (Long Covid) <sup>9,10</sup>. However, the population  
52 prevalence of persistent infections, their viral load kinetics, and evolutionary  
53 dynamics over the course of infections remain largely unknown. We identified 381  
54 infections lasting at least 30 days, of which 54 lasted at least 60 days. These  
55 persistently infected individuals had more than 50% higher odds of self-reporting  
56 Long Covid compared to the infected controls, and we estimate that 0.09-0.5% of  
57 SARS-CoV-2 infections can become persistent and last for at least 60 days. In  
58 nearly 70% of the persistent infections we identified, there were long periods during  
59 which there were no consensus changes in virus sequences, consistent with  
60 prolonged presence of non-replicating virus. Our findings also suggest reinfections  
61 with the same major lineage are rare and that many persistent infections are  
62 characterised by relapsing viral load dynamics. Furthermore, we found a strong  
63 signal for positive selection during persistent infections, with multiple amino acid  
64 substitutions in the Spike and ORF1ab genes emerging independently in different  
65 individuals, including mutations that are lineage-defining for SARS-CoV-2 variants, at  
66 target sites for several monoclonal antibodies, and commonly found in  
67 immunocompromised patients <sup>11-14</sup>. This work has significant implications for  
68 understanding and characterising SARS-CoV-2 infection, epidemiology, and  
69 evolution.

70

## 71 **Main**

72

73 The emergence of highly divergent variants of SARS-CoV-2 has been a defining  
74 feature of the COVID-19 pandemic. While the evolutionary origins of these variants  
75 are still a matter of speculation, multiple pieces of evidence point to chronic  
76 persistent infections as their most likely source <sup>5,7,15</sup>. In particular, infections in  
77 immunocompromised patients who cannot clear the virus may lead to persistence for  
78 months <sup>6,7,16,17</sup> or even years <sup>8,18</sup> before potentially seeding new outbreaks in the  
79 community <sup>3</sup>. Persistence of SARS-CoV-2 during chronic infections exposes the viral  
80 population to host-immune responses and other selective pressures as a result of  
81 treatments over prolonged periods of time. They also release the virus from  
82 undergoing the tight population bottlenecks that are characteristic of SARS-CoV-2  
83 transmission <sup>19,20</sup>, making the viral population less vulnerable to stochastic genetic  
84 drift. These adaptive intrahost changes can lead to elevated evolutionary rates,  
85 particularly in key regions of the Spike protein that are often associated with immune  
86 escape and elevated rates of transmission <sup>13,14</sup>.

87

88 Despite the significant public health implications of persistent infections, uncertainty  
89 still surrounds how common these infections are among the general population, how

90 long they last, their potential for adaptive evolution, and their contribution to Long  
91 Covid.

92

93 In this work, we leveraged genetic, symptom, and epidemiological data from the  
94 Office for National Statistics Covid Infection Survey (ONS-CIS) <sup>21</sup>, an ongoing large  
95 scale community-based surveillance study carried out in the UK. We identified  
96 individuals with persistent SARS-CoV-2 infection and characterised various aspects  
97 of their infection including evolutionary changes in the virus, viral load kinetics,  
98 number of reported symptoms, and prevalence of Long Covid.

99

## 100 Identifying persistent infections

101

102 We considered more than 100,000 high-quality sequenced samples from the ONS-  
103 CIS collected between 2nd November 2020 to 15th August 2022, and representing  
104 ~95,000 people living in ~75,000 households across the UK (see **Methods**).

105 Individuals in the survey were typically sampled once a week for the first four weeks  
106 of their enrolment, and then monthly thereafter. To identify persistent infections we  
107 first limited the dataset to individuals with two or more RT-PCR positive samples with  
108 cycle threshold (Ct) values  $\leq 30$  (in which sequencing was attempted; a proxy for viral  
109 load), taken at least 26 days apart, and where the consensus sequences were of the  
110 same major lineages of Alpha, Delta, BA.1 or BA.2 (BA.4 and BA.5 not considered).  
111 If those sequences also shared the same rare single nucleotide polymorphisms  
112 (SNPs) at one or more sites relative to the major-lineage population-level consensus,  
113 we classified them as having a persistent infection.

114

115 We defined a rare mutation as one observed in 400 or fewer samples within the  
116 entire ONS-CIS dataset, giving a false positive rate of identifying persistent infections  
117 of 0-3% depending on the major lineage (see **Methods** and **Supplementary Figure**  
118 **1**). We note that the rare SNP method provides a conservative estimate for the true  
119 number of persistent infections since some persistent infections may not have rare  
120 mutations. To further evaluate the robustness of our method in identifying persistent  
121 infections, we considered the phylogenetic relationship between the sequences from  
122 persistent infections relative to other sequences of the same major lineage that  
123 belonged to individuals with only a single sequence within the ONS-CIS dataset. The  
124 great majority of sets of sequences identified as belonging to the same persistent  
125 infection formed monophyletic groups with strong bootstrap support (**Figure 1a**; see  
126 also **Supplementary Figure 2**). However, seven sequences did not group with the  
127 other sequence(s) from the same persistent infection. All of these had high Ct values  
128 (Ct~30) and poor genome coverage which may explain their lack of clustering on the  
129 phylogeny (**Supplementary Figure 2**).

130

131 We found 381 persistent infections with sequences spanning at least 26 days, of  
132 which 54 spanned at least 56 days, representing nearly 0.07% (54/77,561) of all  
133 individuals with one or more sequences (with  $Ct \leq 30$ ) of the four major lineages we

134 investigated in this study (**Figure 1b**; see also **Table 1**). Notably, 9% (2/23), 9%  
135 (19/219), and 8% (8/208) of sequences from persistent infections with Alpha, Delta,  
136 and BA.1, respectively, were sampled weeks after when the corresponding major  
137 lineage has dropped to  $\leq 1\%$  frequency of all the ONS-CIS sequences (**Figure 1c**);  
138 the longest infection was with BA.1 and lasted for at least 193 days (see **Figure 1b**).

139  
140 The actual duration of persistent infections are likely to be at least 3-4 days longer  
141 than the time between when the first and last sequenced samples were collected,  
142 since it typically takes 3-4 days since the start of infection for viral loads to be  
143 sufficiently high to be sequenced ( $Ct \leq 30$ )<sup>22,23</sup>, and similarly viral loads will be too low  
144 ( $Ct$  values too high) to sequence at the tail end of infection. Since individuals were  
145 typically sampled weekly during the first four weeks of enrollment, followed by  
146 monthly sampling thereafter, it is unsurprising that most persistent infections had  
147 observable durations clustering around 30 or 60 days (see **Supplementary Figure**  
148 **3**).

149  
150 We found evidence suggestive of transmission from 11 persistently infected  
151 individuals: we identified two households each with two members having concurrent  
152 persistent infections, and in nine other households, one member tested positive for  
153 SARS-CoV-2 by RT-PCR within 10 days of a positive sequenced sample being  
154 collected from a persistently infected individual from the same household. As well as  
155 being clustered in households, the sequences from the suspected persistently  
156 infected source and the recipient had either no consensus nucleotide differences  
157 (nine cases) or one consensus nucleotide difference (two cases), consistent with  
158 transmission. If these do represent transmission, it is worth noting that none of these  
159 persistent infections involved highly divergent sequences relative to their first  
160 sequence, and hence these do not provide an example of the emergence and  
161 spread of highly divergent lineages.

### 162 163 Identifying reinfections with the same major lineage

164  
165 We considered a pair of sequences from the same individual to indicate a reinfection  
166 if they were sampled at least 26 days apart, had at least one consensus nucleotide  
167 difference between the sequenced sampling timepoints, and shared no rare SNPs  
168 (see **Methods**). This criterion may overestimate the true number of reinfections as  
169 some persistent infections may not have a rare SNP, and within-host evolution can  
170 lead to the loss of a rare SNP and/or the gain of other mutations leading to  
171 differences in the consensus sequence between the samples. We identified three  
172 individuals for which pairs of sequences from different sampling timepoints had no  
173 identical rare SNPs and at least one consensus difference, but whose viral load  
174 trajectories were consistent with a persistent chronic infection. We therefore  
175 excluded these individuals from the reinfection group (see **Supplementary Figure**  
176 **4**).

177

178 Overall, we identified 60 reinfections with the same major lineage (**Table 1**). Of all  
179 the cases classed as either persistent infections or reinfections with the same major  
180 lineage, 10-15% were classed as reinfections (see **Table 1**), rising to 20-40% if only  
181 samples collected at least 56 days apart were included (see **Figure 1b**). This  
182 suggests the number of individuals reinfected with the same major lineage is low  
183 compared to the number of individuals with persistent infection. Sequences from  
184 individuals identified as reinfected, collected at the point of primary infection and  
185 reinfection, did not form monophyletic groups and mostly belonged to distantly  
186 related subclades, and hence supports our method for identifying reinfections  
187 (**Figure 1a; Supplementary Figure 2**).

188

#### 189 Evidence of non-replicating virus during infection

190

191 Of the 381 persistently infected individuals that we identified, nearly 70% (267/381)  
192 had a pair of sequenced samples taken at least 26 days apart with no nucleotide  
193 differences at the consensus level. This is striking given the between-host within-  
194 lineage evolutionary rate of SARS-CoV-2 of ~2 single nucleotide variants (SNVs) per  
195 month<sup>24-26</sup>. We contrasted the number of consensus nucleotide differences between  
196 pairs of samples from persistent infections with 16,000 random pairs of sequences  
197 sampled from the complete set of sequenced samples from the ONS-CIS, and with  
198 each pair from the same major lineage (**Supplementary Figure 5**). Of these, only 6  
199 pairs had no SNVs (i.e., less than 0.04% of pairs).

200

#### 201 Emergence of notable mutations

202

203 For all pairs of sequences from each of the persistent infections, we identified  
204 mutations for which there was a change in consensus between the two sampling  
205 time points. Among the 381 persistently infected individuals, we observed 317  
206 changes in the consensus nucleotide representing 277 unique mutations, and 31  
207 deletions representing 18 unique deletions. Many of these mutations have previously  
208 been identified as either lineage-defining mutations for variants of concern or  
209 variants of interest<sup>27</sup> (eight mutations and two deletions), recurrent mutations in  
210 immunocompromised individuals<sup>12-14</sup> (15 mutations and four deletions), or key  
211 mutations with antibody escape properties and target sites for various different  
212 monoclonal antibodies<sup>11,28</sup> (seven mutations) (**Supplementary Table 1**).

213

214 We observed several mutations at the same genomic positions in multiple individuals  
215 over the course of their persistent infections. For example, three BA.2 infected  
216 individuals from different households acquired a mutation at codon position 547 in  
217 Spike (**Figure 2**), two of which were the T547K mutation which is a lineage-defining  
218 mutation for BA.1, and one the K547T mutation (**Figure 2c**; also see  
219 **Supplementary Table 1**). Strikingly, twelve individuals acquired a deletion  
220 (ORF1ab:  $\Delta$ 81-87) in the NSP1 coding region. A similar deletion has previously been  
221 observed during the chronic infection of an immunocompromised individual with

222 cancer<sup>16</sup>, and was associated with lower type I interferon response in infected cells  
223<sup>29</sup>. We also identified a persistent infection with BA.1 lasting for at least 133 days  
224 during which 33 unique mutations (23 mutations in ORF1ab, 6 in Spike, 1 in ORF3a,  
225 1 in M, and 2 in ORF7) were observed (see **Supplementary Figure 2**); eleven of the  
226 ORF1ab mutations and all of the mutations in Spike, ORF3a, and ORF7 were  
227 nonsynonymous.

228  
229 Overall, we observed a strong signal for positive selection in Spike, with nearly nine-  
230 fold more nonsynonymous compared to synonymous mutations (**Figure 2b**). With a  
231 total of seven nonsynonymous mutations, ORF8 had the highest per base number of  
232 nonsynonymous mutations followed by Spike with 61 nonsynonymous mutations.

### 233 234 Persistence with relapsing viral load

235  
236 Of the 381 persistent infections, 65 had three or more RT-PCR tests taken over the  
237 course of their infection. We classified these infections as persistent-relapsing if they  
238 had a negative RT-PCR test during the infection (n=20), and the rest as persistent-  
239 chronic (n=45) (**Figure 3a,b**). Given the weekly or monthly sampling of individuals  
240 enrolled in the ONS-CIS, infections classed as persistent-chronic may have  
241 unsampled periods of very low viral burden, meaning the persistent-relapsing  
242 category is likely to be an underestimate. Nonetheless, the observation of relapsing  
243 viral load dynamics in over 30% of cases is striking given that, in the absence of  
244 genetic information, they could have been misidentified as reinfections, depending  
245 on the definition used. Of the 27 cases identified as reinfections with three or more  
246 RT-PCR tests, all showed relapsing viral load dynamics (**Figure 3c**).

247  
248 As the sampling strategy of ONS-CIS is based on testing representative individuals  
249 across the UK regardless of symptoms, we can estimate the percentage of SARS-  
250 CoV-2 infections that are persistent and last for longer than 60 days in the general  
251 population. This requires making assumptions about how many persistent infections  
252 are missed among ONS-CIS participants due to the monthly (and weekly) sampling.  
253 More precisely, estimating the proportion of infections that are persistent depends on  
254 the proportion of days the infection has sequenceable virus during the infection  
255 (would have Ct $\leq$ 30 if tested); the fewer the number of days the infection has  
256 sequenceable virus, the more likely it is that a persistent infection is missed. By  
257 taking two extreme scenarios for the proportion of days that the virus is  
258 sequenceable during persistent infection (0.7 and 0.14; see **Methods**), we estimate  
259 that approximately 0.1-0.5% of infections become persistent for 60 days or more.

### 260 261 Difference in viral load and symptoms

262  
263 For the majority of persistent infections, Ct values (inversely proportional to viral titre  
264<sup>30</sup>) were higher at the last sequenced time point compared to the first sequenced  
265 time point (**Figure 3d**). For reinfections with the same major lineage, the last

266 sequenced sample also had higher Ct values than the first, but the magnitude of the  
267 difference was smaller compared to persistent infections (**Figure 2d**). In both cases,  
268 the rise in Ct value (decrease in viral titre) during infections or between reinfections  
269 could be a consequence of host immunity or within-host compartmentalisation.  
270 Additionally, the rise in Ct for reinfections could be due to the disproportionate  
271 sampling of individuals with older infections, which tend to have lower viral loads,  
272 towards the end of an epidemic wave <sup>31,32</sup>.

273  
274 Individuals with persistent infections remained largely asymptomatic during the later  
275 stages of infection, with, on average, reporting two fewer symptoms in the last 7  
276 days at the last time of sampling (at which a sequence was obtained) when  
277 compared to the first. They also consistently reported very few or no symptoms after  
278 the first positive sample (**Figure 3e**). In comparison, individuals reinfected with the  
279 same major lineage reported on average only one fewer symptom at the reinfection  
280 sampling time point compared to the primary sampling time point (**Figure 3e**).

281

## 282 Prevalence of Long Covid

283

284 From February 2021, as well as reporting symptoms, participants were asked if they  
285 describe themselves as having Long Covid and still experiencing symptoms more  
286 than four weeks after they first had COVID-19 (see **Methods**). We estimated the  
287 prevalence of self-reported Long Covid in the persistently infected individuals  
288 compared with a control group, accounting for several confounding variables (see  
289 **Methods**). In the persistent infection group, 9.0% of respondents (32/354) self-  
290 reported Long Covid at their first visit  $\geq 12$  weeks since the start of infection, and  
291 7.1% (19/266) reported Long Covid at  $\geq 26$  weeks. However, in the control group,  
292 only 5.1% (4,976/97,404) reported Long Covid at their first visit  $\geq 12$  weeks, and 4.5%  
293 (3,261/72,407) reported Long Covid at  $\geq 26$  weeks.

294

295 Correcting for confounders, we found strong evidence for a 55% higher odds of  
296 reporting Long Covid  $\geq 12$  weeks post-infection among persistently infected  
297 individuals compared to controls (Chi square test with Yates correction <sup>33</sup>  $p=0.004$  for  
298 the unadjusted model,  $p=0.021$  for the adjusted model), but no evidence of a  
299 difference for Long Covid  $\geq 26$  weeks post-infection ( $p=0.127$  for the unadjusted  
300 model,  $p=0.367$  for the adjusted model) (**Table 2**). The lower rate of reporting Long  
301 Covid 26 weeks post-infection could be because the majority of the persistent  
302 infections we identified lasted for less than 26 weeks, and hence persistence of an  
303 infection may no longer be a contributing factor to Long Covid.

304

## 305 **Discussion**

306

307 We developed a robust approach for identifying persistent SARS-CoV-2 infections in  
308 individuals with sequenced samples spanning a month or longer. Of the 381  
309 persistent infections we identified among participants of the ONS-CIS, 54 lasted at

310 least two months, two over six months, and in some cases the infecting lineage had  
311 gone extinct in the general population. In contrast, we only identified 60 reinfections  
312 by the same major lineage as the primary infection, suggesting immunity to the same  
313 variant remains strong after infection, at least until the lineage has gone extinct.

314  
315 The large number of persistent infections we uncovered is striking, given the leading  
316 hypothesis that many of the variants of concern (VOCs) emerged wholly or partially  
317 during long-term chronic infections in immunocompromised individuals<sup>1</sup>. Since the  
318 ONS-CIS is a community-based surveillance study, our observations suggest the  
319 pool of people in which long-term infections could occur, and hence potential  
320 sources of divergent variants, may be much larger than generally thought. We  
321 estimate that more than nearly one in a thousand of all infections, and potentially as  
322 many as one in 200, may become persistent for at least two months. The harbouring  
323 of these persistent infections in the general community may also help explain the  
324 early detection of cryptic lineages circulating in wastewaters<sup>34,35</sup> long before they  
325 spread in the population at large.

326  
327 In support of the hypothesis that VOCs may emerge during prolonged infections, a  
328 number of studies have shown elevated evolutionary rates driven by selection during  
329 chronic infections of immunocompromised individuals<sup>6-8</sup>. Among the persistently  
330 infected individuals we identified, we also found strong evidence for positive  
331 selection and parallel evolution, particularly in Spike and ORF1ab. In the most  
332 extreme case, we observed one persistent infection with 33 substitutions over a four-  
333 month period, 20 of which were nonsynonymous.

334  
335 Potentially more remarkable, however, was our discovery of viral infections exhibiting  
336 latent evolutionary dynamics, with no consensus level genome changes for two  
337 months or longer. As far as we are aware, this is the first study to demonstrate that  
338 decelerated evolutionary rates may be a common outcome of persistent infection.  
339 The factors causing these low rates of evolution are unknown, but one possible  
340 explanation is infection of long-lived cells<sup>36,37</sup> which then seed new outbreaks within  
341 the infected individual weeks or months later. Although the relapsing viral load  
342 dynamics we found in many of the persistently infected individuals supports this  
343 hypothesis, we did not find any consistent pattern between the amount of viral  
344 divergence during infection and the lower viral load activity in these individuals.

345  
346 Intriguingly, individuals with persistent infections report fewer symptoms later in a  
347 persistent infection compared to at their first positive sample, or remain  
348 asymptomatic throughout infection, but have more than 50% higher odds of Long  
349 Covid compared to a control group. Although the link between viral persistence and  
350 Long Covid may not be causal, these results suggest persistent infections could be  
351 contributing to the pathophysiology of Long Covid<sup>10,38</sup>, as also evidenced by the  
352 observation of circulating SARS-CoV-2 S1 spike protein in a subset of patients with  
353 Long Covid months after first infection<sup>39</sup>. The association between persistent



354 infection and Long Covid does not imply that every persistent infection can lead to  
355 Long Covid, only 9% of persistently infected individuals reported having Long Covid,  
356 nor does it mean that all cases of Long Covid are due to a persistent infection.  
357 Indeed, many other possible mechanisms have been suggested to contribute to  
358 Long Covid including autoimmunity/inflammation, organ damage, EBV reactivation,  
359 and micro thrombosis (see ref <sup>10</sup> for a recent review).

360  
361 Taken together, our observations highlight the continuing importance of community-  
362 based genomic surveillance both to monitor the emergence and spread of new  
363 variants, but also to gain a fundamental understanding of the natural history and  
364 evolution of novel pathogens and their clinical implications for patients.

## 365 366 **Methods**

### 367 ONS COVID-19 Infection Survey

368  
369 The ONS-CIS is a UK household-based surveillance study in which participant  
370 households are approached at random from address lists across the country to  
371 provide a representative sample of the population <sup>40</sup>. All individuals aged two years  
372 and older from each household who provide written informed consent provide swab  
373 samples (taken by the participant or parent/carer for those under 12 years),  
374 regardless of symptoms, and complete a questionnaire at assessments, which occur  
375 weekly for the first month in the survey and then monthly. From 26 April 2020 to 31  
376 July 2022, assessments were conducted by study workers visiting each household;  
377 from 14 July 2022 onwards assessments were remote, with swabs taken using kits  
378 posted to participants and returned by post or courier, and questionnaires completed  
379 online or by telephone. Positive swab samples with  $Ct \leq 30$  were sent for sequencing  
380 (see below). For this analysis, we included data from 2nd November 2020 to 15th  
381 August 2022, spanning a period from the earliest Alpha to latest Omicron BA.2  
382 sequences within the ONS-CIS dataset.  
383  
384

385  
386 This work contains statistical data from ONS which is Crown Copyright. The use of  
387 the ONS statistical data in this work does not imply the endorsement of the ONS in  
388 relation to the interpretation or analysis of the statistical data. This work uses  
389 research datasets which may not exactly reproduce National Statistics aggregates.

### 390 Sequencing

391  
392 From December 2020 onwards sequencing was attempted on all positive samples  
393 with  $Ct \leq 30$ ; before this date, sequencing was attempted in real-time wherever  
394 possible, with some additional retrospective sequencing of stored samples. The vast  
395 majority of samples were sequenced on Illumina Novaseq, with a small number  
396 using Oxford Nanopore GridION or MINION. One of two protocols were used: either  
397

398 the ARTIC amplicon protocol <sup>41</sup> with consensus FASTA sequence files generated  
399 using the ARTIC nextflow processing pipeline <sup>42</sup>, or veSeq, an RNASeq protocol  
400 based on a quantitative targeted enrichment strategy <sup>19,43</sup> with consensus sequences  
401 produced using *shiver* <sup>44</sup>. During our study period, we identified 94,943 individuals  
402 with a single sequence and 5,774 individuals with two or more sequences. Here, we  
403 only included sequences with  $\geq 50\%$  genome coverage.

404

#### 405 Identifying rare SNPs

406

407 An important criterion for determining whether two sequences from the same  
408 individual are from the same infection is whether they share a rare single nucleotide  
409 polymorphism (SNP). These are defined as SNPs that are shared by fewer than 400  
410 sequences corresponding to each major lineage within the full ONS-CIS dataset  
411 (**Supplementary Figure 1**). The thresholds were chosen to maximise the number of  
412 persistent infections identified whilst minimising the number of false positives (see  
413 below). The major lineages we considered were Alpha (B.1.1.7), Delta (B.1.617.2),  
414 Omicron BA.1 and Omicron BA.2, including their sublineages. Approximately 92-  
415 98% of all sequences from the four major lineages had a rare SNP relative to the  
416 major-lineage population-level consensus.

417

#### 418 Identifying reinfections with the same major lineage

419

420 Any pair of sequences from the same individual, of the same major lineage, and at  
421 least 26 days apart were considered as candidate reinfections. Of these, pairs that  
422 had at least one nucleotide difference at the consensus level, and did not share any  
423 rare SNPs, were classed as reinfections. Pairs that had no identical rare SNPs, nor  
424 any nucleotide differences at the consensus level, were classed as undetermined.

425

#### 426 Identifying individuals with persistent infection

427

428 We first identified individuals with two or more sequenced samples taken at least 26  
429 days apart. We chose this cutoff because the majority of acutely infected individuals  
430 shed the virus for  $<20$  days and no longer than 30 days in the respiratory tract <sup>23,45</sup>.  
431 Given the extreme heterogeneity in the shedding profiles during some acute  
432 infections <sup>23</sup>, we also considered a more conservative 56-day cutoff for some  
433 analyses.

434

435 For each identified individual we calculated the number of consensus nucleotide  
436 differences per site for all within-individual pairwise combinations of samples  
437 (**Supplementary Figure 6**). Only sites where a nucleotide difference could be called  
438 were included.

439

440 Candidate persistent infections were defined in one of two ways: (1) pairs of  
441 sequenced samples that belonged to the same major lineage, and (2) pairs of

442 sequenced samples where one or both had no defined phylogenetic lineage, but  
443 where the genetic distance between them was lower than that required to  
444 differentiate two major lineages (see **Supplementary Figure 6**). We assumed pairs  
445 belonging to different major lineages were either coinfections or reinfections with two  
446 different virus lineages. Only candidate persistent infections were considered in  
447 further analysis.

448  
449 Among the pool of candidate persistent infections, we defined persistent infections  
450 as those with sequences sharing one or more rare SNPs at two or more consecutive  
451 time points relative to the population-level consensus. A rare SNP is one that is  
452 observed in 400 or fewer samples within the entire ONS-CIS dataset.

#### 453 454 Determining the false positive rate for persistent infections

455  
456 For each major lineage we generated a data set of 1,000 randomly paired  
457 sequences from different individuals in the ONS-CIS, each sampled at least 26 days  
458 apart. We determined the number of these pairs that would have been incorrectly  
459 identified as persistent infections as a function of the threshold for determining if a  
460 SNP is rare (**Supplementary Figure 1**). Although the total number of persistent  
461 infections identified grew as the threshold for determining if a SNP is rare increased,  
462 at very high thresholds the rate of false positives was also high. In our study, we  
463 chose a threshold of 400 sequences (corresponding to all sequences of the same  
464 major lineage within the full ONS-CIS dataset) for all of the major lineages, giving a  
465 false positive rate (identifying an infection as persistent when it was not) of 0-3%.

#### 466 467 Estimating the prevalence of persistent infections

468  
469 Within the ONS-CIS we identified 54 infections that lasted 60 days or more.  
470 Comparing this to the number of individuals that had sequenced samples belonging  
471 to Alpha, Delta, BA.1 or BA.2, which to a good approximation will be the number of  
472 infections of these variants, we identified approximately 54/77,561 (0.07%) infections  
473 as persistent for  $\geq 60$  days. Since the ONS-CIS is a representative sample of  
474 individuals from the general population, we can estimate the percentage of all SARS-  
475 CoV-2 infections that became persistent for two months or longer. At one extreme, if  
476 all persistent infections have sequenceable virus for only four days per month  
477 (assuming viral dynamics similar to one acute infection each month), only 14% of  
478 persistent infections would be detected through monthly sampling. Correcting for  
479 this, we would estimate the percentage of persistent infections in the general  
480 population to be 0.5% ( $0.07\% / 0.14$ ). At the other extreme, if we assume all  
481 persistent-chronic infections (70% of persistent infections; see Main text) are  
482 detectable through monthly sampling, and the rest have detectable virus for 4 days  
483 per month, then we estimate that 74% ( $70\% + 0.14 \cdot 30\%$ ) of persistent infections  
484 were identified, giving an estimate of 0.09% ( $0.07\% / 0.74$ ) infections being  
485 persistent in the general population.

486

## 487 Phylogenetic analysis

488

489 For each of the four major lineages, we chose 600 consensus sequences with at  
490 least 95% coverage from the ONS-CIS dataset using weighted random sampling,  
491 with each sample of major lineage  $i$  collected in week  $j$  given a weight  $1/n_{ij}$ , where  $n_{ij}$   
492 is the number of sequences of major lineage  $i$  collected during week  $j$ <sup>25</sup>. These  
493 sequences were added as a background set to the collection of all consensus  
494 sequences for samples from persistent infections and reinfections. Mapping of each  
495 sequence to the Wuhan-Hu-1 reference sequence was already performed by *shiver*  
496 and thus a full alignment for each of the four lineages could be constructed using  
497 only this.

498

499 Maximum likelihood phylogenetic trees were constructed using IQ-TREE 1.6.12<sup>46</sup>  
500 using the GTR+gamma substitution model and the ultrafast bootstrap<sup>47</sup>. Each tree  
501 was rooted using the collection dates of the samples and the heuristic residual mean  
502 square algorithm in TempEst<sup>48</sup>. Visualisation used ggtree<sup>49</sup>.

503

## 504 Comparing viral load activities and symptoms

505

506 To quantify the changes in viral load activities during persistent infections, we  
507 compared Ct values at the last time point a sequence was obtained to when the first  
508 sequence was collected. Similarly, for reinfections, we compared the changes in Ct  
509 value between the primary infection and reinfection. We used a paired t-test to  
510 calculate p-values in both cases as the distribution of differences in Ct values were  
511 normally distributed for both persistent infections ( $W=0.99$ ,  $p=0.28$ ) and reinfections  
512 ( $W=0.99$ ,  $p=0.78$ ) as determined by the Shapiro-Wilk test<sup>50</sup>.

513

514 We also tracked 12 symptoms consistently solicited from all participants at every  
515 assessment. Symptoms were fever, weakness/tiredness, diarrhoea, shortness of  
516 breath, headache, nausea/vomiting, sore throat, muscle ache, abdominal pain,  
517 cough, loss of smell, and loss of taste. At each follow-up assessment, participants  
518 were asked whether these 12 symptoms had been present in the past seven days.  
519 Symptom discontinuation was defined as the first occurrence of two successive  
520 follow-up visits without reporting symptoms. To compare symptom counts during  
521 persistent infections and reinfections, we used the paired Wilcoxon test as the  
522 distribution of symptom differences is not normally distributed (see **Figure 3d**).

523

## 524 Long Covid analysis

525

526 From February 2021, at every assessment, participants were asked “would you  
527 describe yourself as having Long Covid, that is, you are still experiencing symptoms  
528 more than 4 weeks after you first had COVID-19, that are not explained by  
529 something else?”. When estimating Long Covid prevalence in this analysis, we

530 considered the first assessment at least 12 weeks and at least 26 weeks after  
531 infection. Our control group comprised all individuals with a positive PCR test and  
532  $Ct \leq 30$ , excluding the persistently infected individuals identified in this study, over the  
533 same time span as persistent infections. We also ensured the follow-up from the  
534 start of infection to first Long Covid response was similar between persistent  
535 infections and controls (see **Table 2**).

536

537 In calculating the odds ratio of Long Covid in persistently infected individuals relative  
538 to the control group, we accounted for confounding variables such as age at the last  
539 birthday, sex, Ct value, calendar date, area deprivation quintile group, presence of  
540 self-reported long-term health conditions (binary), vaccination status (unvaccinated  
541 or single-vaccinated, fully-vaccinated or booster-vaccinated 14-89 days ago, fully-  
542 vaccinated or booster-vaccinated 90-179 days ago, fully-vaccinated or booster-  
543 vaccinated  $\geq 180$  days ago), and days from first positive test to Long Covid follow-up  
544 response. All variables except the last one were defined at the time of the first  
545 positive test. Continuous variables (age, Ct value, calendar date, days to follow-up  
546 response) were modelled as restricted cubic splines with a single internal knot at the  
547 median of the distribution and boundary knots at the 5<sup>th</sup> and 95<sup>th</sup> percentiles.  
548 Vaccination status was derived from a combination of CIS and NIMS data for  
549 participants in England, and CIS data alone for participants in Wales, Scotland and  
550 Northern Ireland.

551

552 We were unable to do the Long Covid analysis for the reinfection group due to the  
553 low number of participants in this cohort who reported new-onset Long Covid  $\geq 12$   
554 weeks or  $\geq 26$  weeks after infections.

555

556

## 557 **Funding Statement**

558

559 The CIS was funded by the Department of Health and Social Care and the UK  
560 Health Security Agency with in-kind support from the Welsh Government, the  
561 Department of Health on behalf of the Northern Ireland Government and the Scottish  
562 Government. COG-UK is supported by funding from the Medical Research Council  
563 (MRC) part of UK Research & Innovation (UKRI), the National Institute of Health  
564 Research (NIHR) (grant code: MC\_PC\_19027), and Genome Research Limited,  
565 operating as the Wellcome Sanger Institute. The authors acknowledge use of data  
566 generated through the COVID-19 Genomics Programme funded by the Department  
567 of Health and Social Care. ASW is supported by the National Institute for Health  
568 Research Health Protection Research Unit (NIHR HPRU) in Healthcare Associated  
569 Infections and Antimicrobial Resistance at the University of Oxford in partnership  
570 with the UK Health Security Agency (UK HSA) (NIHR200915) and the NIHR Oxford  
571 Biomedical Research Centre, and is an NIHR Senior Investigator. TH is supported  
572 by the Royal Society and Alan Turing Institute for Data Science and Artificial  
573 Intelligence. KAL is supported by the Royal Society and the Wellcome Trust

574 (107652/Z/15/Z). The research was supported by the Wellcome Trust Core Award  
575 Grant Number 203141/Z/16/Z with funding from the NIHR Oxford BRC. The views  
576 expressed are those of the author(s) and not necessarily those of the NHS, the NIHR  
577 or the Department of Health. The views expressed are those of the author and not  
578 necessarily those of the Department of Health and Social Care or UKHSA.

579

#### 580 **Data and materials availability**

581

582 All genomic data have been made publicly available as part of the COVID-19  
583 Genomics UK (COG-UK) Consortium <sup>51</sup>. All other data, excluding personal clinical  
584 information on participants, are available in the main text, supplementary materials,  
585 or our GitHub repository ([https://github.com/mg878/ONS-CIS\\_analysis](https://github.com/mg878/ONS-CIS_analysis)).

586

587 **References**

588

- 589 1. Dennehy, J. J., Gupta, R. K., Hanage, W. P., Johnson, M. C. & Peacock, T. P. Where is  
590 the next SARS-CoV-2 variant of concern? *Lancet* **399**, 1938–1939 (2022).
- 591 2. Otto, S. P. *et al.* The origins and potential future of SARS-CoV-2 variants of concern in  
592 the evolving COVID-19 pandemic. *Curr. Biol.* **31**, R918–R929 (2021).
- 593 3. Gonzalez-Reiche, A. S. *et al.* SARS-CoV-2 variants in the making: Sequential intrahost  
594 evolution and forward transmissions in the context of persistent infections. *medRxiv*  
595 2022.05.25.22275533 (2022) doi:10.1101/2022.05.25.22275533.
- 596 4. Hill, V. *et al.* The origins and molecular evolution of SARS-CoV-2 lineage B.1.1.7 in the  
597 UK. *Virus Evolution* **8**, veac080 (2022).
- 598 5. Ghafari, M., Liu, Q., Dhillon, A., Katzourakis, A. & Weissman, D. B. Investigating the  
599 evolutionary origins of the first three SARS-CoV-2 variants of concern. *Frontiers in*  
600 *Virology Section: Diversification and Evolution*, (2022).
- 601 6. Choi, B. *et al.* Persistence and Evolution of SARS-CoV-2 in an Immunocompromised  
602 Host. *N. Engl. J. Med.* **383**, 2291–2293 (2020).
- 603 7. Kemp, S. A. *et al.* SARS-CoV-2 evolution during treatment of chronic infection. *Nature*  
604 **592**, 277–282 (2021).
- 605 8. Chaguza, C. *et al.* Accelerated SARS-CoV-2 intrahost evolution leading to distinct  
606 genotypes during chronic infection. *medRxiv* (2022) doi:10.1101/2022.06.29.22276868.
- 607 9. Swank, Z. *et al.* Persistent Circulating Severe Acute Respiratory Syndrome Coronavirus  
608 2 Spike Is Associated With Post-acute Coronavirus Disease 2019 Sequelae. *Clin. Infect.*  
609 *Dis.* ciac722 (2022) doi:10.1093/cid/ciac722.
- 610 10. Davis, H. E., McCorkell, L., Vogel, J. M. & Topol, E. J. Long COVID: major findings,  
611 mechanisms and recommendations. *Nat. Rev. Microbiol.* (2023) doi:10.1038/s41579-  
612 022-00846-2.
- 613 11. Starr, T. N. *et al.* Deep Mutational Scanning of SARS-CoV-2 Receptor Binding Domain  
614 Reveals Constraints on Folding and ACE2 Binding. *Cell* **182**, 1295–1310.e20 (2020).

- 615 12. McCarthy, K. R. *et al.* Recurrent deletions in the SARS-CoV-2 spike glycoprotein drive  
616 antibody escape. *Science* **371**, 1139–1142 (2021).
- 617 13. Harari, S. *et al.* Drivers of adaptive evolution during chronic SARS-CoV-2 infections.  
618 *Nature Medicine* **28**, 1501–1508 (2022).
- 619 14. Wilkinson, S. A. J. *et al.* Recurrent SARS-CoV-2 mutations in immunodeficient patients.  
620 *Virus Evol* **8**, veac050 (2022).
- 621 15. Rambaut, A. *et al.* Preliminary genomic characterisation of an emergent SARS-CoV-2  
622 lineage in the UK defined by a novel set of spike mutations. *Virological*  
623 [https://virological.org/t/preliminary-genomic-characterisation-of-an-emergent-sars-cov-2-](https://virological.org/t/preliminary-genomic-characterisation-of-an-emergent-sars-cov-2-lineage-in-the-uk-defined-by-a-novel-set-of-spike-mutations/563)  
624 [lineage-in-the-uk-defined-by-a-novel-set-of-spike-mutations/563](https://virological.org/t/preliminary-genomic-characterisation-of-an-emergent-sars-cov-2-lineage-in-the-uk-defined-by-a-novel-set-of-spike-mutations/563) (2020).
- 625 16. Avanzato, V. A. *et al.* Case Study: Prolonged Infectious SARS-CoV-2 Shedding from an  
626 Asymptomatic Immunocompromised Individual with Cancer. *Cell* **183**, 1901–1912.e9  
627 (2020).
- 628 17. Cele, S. *et al.* SARS-CoV-2 prolonged infection during advanced HIV disease evolves  
629 extensive immune escape. *Cell Host Microbe* **30**, 154–162.e5 (2022).
- 630 18. Nussenblatt, V. *et al.* Yearlong COVID-19 Infection Reveals Within-Host Evolution of  
631 SARS-CoV-2 in a Patient With B-Cell Depletion. *J. Infect. Dis.* **225**, 1118–1123 (2022).
- 632 19. Lythgoe, K. A. *et al.* SARS-CoV-2 within-host diversity and transmission. *Science* **372**,  
633 (2021).
- 634 20. Braun, K. M. *et al.* Acute SARS-CoV-2 infections harbor limited within-host diversity and  
635 transmit via tight transmission bottlenecks. *PLoS Pathog.* **17**, e1009849 (2021).
- 636 21. Pouwels, K. B. *et al.* Community prevalence of SARS-CoV-2 in England from April to  
637 November, 2020: results from the ONS Coronavirus Infection Survey. *Lancet Public*  
638 *Health* **6**, e30–e38 (2021).
- 639 22. Kissler, S. M. *et al.* Viral Dynamics of SARS-CoV-2 Variants in Vaccinated and  
640 Unvaccinated Persons. *N. Engl. J. Med.* **385**, 2489–2491 (2021).
- 641 23. Jones, T. C. *et al.* Estimating infectiousness throughout SARS-CoV-2 infection course.  
642 *Science* **373**, (2021).



- 643 24. Ghafari, M. *et al.* Purifying selection determines the short-term time dependency of  
644 evolutionary rates in SARS-CoV-2 and pH1N1 influenza. Preprint at  
645 <https://doi.org/10.1101/2021.07.27.21261148>.
- 646 25. Lythgoe, K. A. *et al.* Lineage replacement and evolution captured by the United  
647 Kingdom Covid Infection Survey. *medRxiv* (2022) doi:10.1101/2022.01.05.21268323.
- 648 26. Neher, R. A. Contributions of adaptation and purifying selection to SARS-CoV-2  
649 evolution. *Virus Evol* **8**, veac113 (2022).
- 650 27. Hodcroft, E. B. CoVariants: SARS-CoV-2 Mutations and Variants of Interest.  
651 <https://covariants.org/> (2021).
- 652 28. Cox, M. *et al.* SARS-CoV-2 variant evasion of monoclonal antibodies based on in vitro  
653 studies. *Nat. Rev. Microbiol.* **21**, 112–124 (2023).
- 654 29. Lin, J.-W. *et al.* Genomic monitoring of SARS-CoV-2 uncovers an Nsp1 deletion variant  
655 that modulates type I interferon response. *Cell Host Microbe* **29**, 489–502.e8 (2021).
- 656 30. Tom, M. R. & Mina, M. J. To Interpret the SARS-CoV-2 Test, Consider the Cycle  
657 Threshold Value. *Clinical infectious diseases: an official publication of the Infectious*  
658 *Diseases Society of America* vol. 71 2252–2254 (2020).
- 659 31. Hay, J. A. *et al.* Estimating epidemiologic dynamics from cross-sectional viral load  
660 distributions. *Science* **373**, (2021).
- 661 32. Fryer, H. R. *et al.* Viral burdens are associated with age and viral variant in a population-  
662 representative study of SARS-CoV-2 that accounts for time-since-infection related  
663 sampling bias. Preprint at <https://doi.org/10.1101/2022.12.02.518847> (2022).
- 664 33. Yates, F. Contingency tables involving small numbers and the  $\chi^2$  test. *Suppl. J. R. Stat.*  
665 *Soc.* **1**, 217 (1934).
- 666 34. Karthikeyan, S. *et al.* Wastewater sequencing reveals early cryptic SARS-CoV-2 variant  
667 transmission. *Nature* **609**, 101–108 (2022).
- 668 35. Shafer, M. M. *et al.* Tracing the origin of SARS-CoV-2 Omicron-like Spike sequences  
669 detected in wastewater. *medRxiv* (2022) doi:10.1101/2022.10.28.22281553.
- 670 36. Lythgoe, K. A., Gardner, A., Pybus, O. G. & Grove, J. Short-Sighted Virus Evolution and

- 671 a Germline Hypothesis for Chronic Viral Infections. *Trends Microbiol.* **25**, 336–348  
672 (2017).
- 673 37. Lythgoe, K. A., Lumley, S. F., Pellis, L., McKeating, J. A. & Matthews, P. C. Estimating  
674 hepatitis B virus cccDNA persistence in chronic infection. *Virus Evol* **7**, veaa063 (2021).
- 675 38. Marx, V. Scientists set out to connect the dots on long COVID. *Nat. Methods* **18**, 449–  
676 453 (2021).
- 677 39. Schultheiß, C. *et al.* Liquid biomarkers of macrophage dysregulation and circulating  
678 spike protein illustrate the biological heterogeneity in patients with post-acute sequelae  
679 of COVID-19. *J. Med. Virol.* **95**, e28364 (2023).
- 680 40. Pouwels, K. B. *et al.* Community prevalence of SARS-CoV-2 in England from April to  
681 November, 2020: results from the ONS Coronavirus Infection Survey. *Lancet Public  
682 Health* **6**, e30–e38 (2021).
- 683 41. COG-UK. COG-UK publication. <https://www.protocols.io/workspaces/coguk/publication>  
684 (2020).
- 685 42. Connor Lab. *ncov2019-artic-nf*. (Github).
- 686 43. Bonsall, D. *et al.* A Comprehensive Genomics Solution for HIV Surveillance and Clinical  
687 Monitoring in Low-Income Settings. *J. Clin. Microbiol.* **58**, (2020).
- 688 44. Wymant, C. *et al.* Easy and accurate reconstruction of whole HIV genomes from short-  
689 read sequence data with shiver. *Virus Evol* **4**, vey007 (2018).
- 690 45. Cevik, M. *et al.* SARS-CoV-2, SARS-CoV, and MERS-CoV viral load dynamics, duration  
691 of viral shedding, and infectiousness: a systematic review and meta-analysis. *Lancet  
692 Microbe* **2**, e13–e22 (2021).
- 693 46. Minh, B. Q. *et al.* IQ-TREE 2: New Models and Efficient Methods for Phylogenetic  
694 Inference in the Genomic Era. *Mol. Biol. Evol.* **37**, 1530–1534 (2020).
- 695 47. Hoang, D. T., Chernomor, O., von Haeseler, A., Minh, B. Q. & Vinh, L. S. UFBoot2:  
696 Improving the Ultrafast Bootstrap Approximation. *Mol. Biol. Evol.* **35**, 518–522 (2018).
- 697 48. Rambaut, A., Lam, T. T., Max Carvalho, L. & Pybus, O. G. Exploring the temporal  
698 structure of heterochronous sequences using TempEst (formerly Path-O-Gen). *Virus*

- 699        *Evol* **2**, vew007 (2016).
- 700    49. Yu, G., Smith, D. K. & Tsan-Yuk, Z. H. L. ggtree: an R package for visualization and  
701        annotation of phylogenetic trees with their covariates and other associated data.  
702        *Methods in Ecology and Evolution* **8**, 28–36 (2017).
- 703    50. Shapiro, S. S. & Wilk, M. B. An Analysis of Variance Test for Normality (Complete  
704        Samples). *Biometrika* **52**, 591–611 (1965).
- 705    51. COVID-19 Genomics UK (COG-UK) consortiumcontact@cogconsortium.uk. An  
706        integrated national scale SARS-CoV-2 genomic surveillance network. *Lancet Microbe* **1**,  
707        e99–e100 (2020).
- 708

709 **Tables**

710

711 **Table 1: Frequency of persistent infections and reinfections per major lineage.**

712

| Major lineage | Reinfection >26 days | Reinfection >56 days | Persistent infection >26 days | Persistent infections >56 days | %Reinfection >26 days | %Reinfection >56 days |
|---------------|----------------------|----------------------|-------------------------------|--------------------------------|-----------------------|-----------------------|
| B.1.1.7       | 7                    | 3                    | 11                            | 3                              | 39%                   | 50%                   |
| B.1.617.2     | 11                   | 4                    | 106                           | 13                             | 9%                    | 24%                   |
| BA.1          | 14                   | 2                    | 97                            | 15                             | 13%                   | 12%                   |
| BA.2          | 28                   | 15                   | 167                           | 23                             | 14%                   | 40%                   |

713

714

715 **Table 2: Prevalence of Long Covid in persistently infected individuals.**

716

717 **Long Covid ≥12 weeks post-infection**

| Group   | <i>n</i> | Long Covid   | Median follow-up (IQR*) | Unadjusted OR† (95% CI**) | Adjusted OR (95% CI) |
|---------|----------|--------------|-------------------------|---------------------------|----------------------|
| Exposed | 356      | 32 (9.0%)    | 101 (91-113)            | 1.27 (1.19-2.47)          | 1.55 (1.07-2.25)     |
| Control | 78,902   | 4,291 (5.4%) | 100 (91-115)            | Reference                 | Reference            |

718

719 **Long Covid ≥26 weeks post-infection**

| Group   | <i>n</i> | Long Covid   | Median follow-up (IQR) | Unadjusted OR (95% CI) | Adjusted OR (95% CI) |
|---------|----------|--------------|------------------------|------------------------|----------------------|
| Exposed | 326      | 19 (5.8%)    | 312 (271-390)          | 1.44 (0.90-2.29)       | 1.24 (0.77-2.00)     |
| Control | 72,608   | 3,000 (4.1%) | 320 (272-384)          | Reference              | Reference            |

720 \* IQR=interquartile range

721 †OR=odds ratio

722 \*\*CI=confidence interval

723 **Figures**  
724

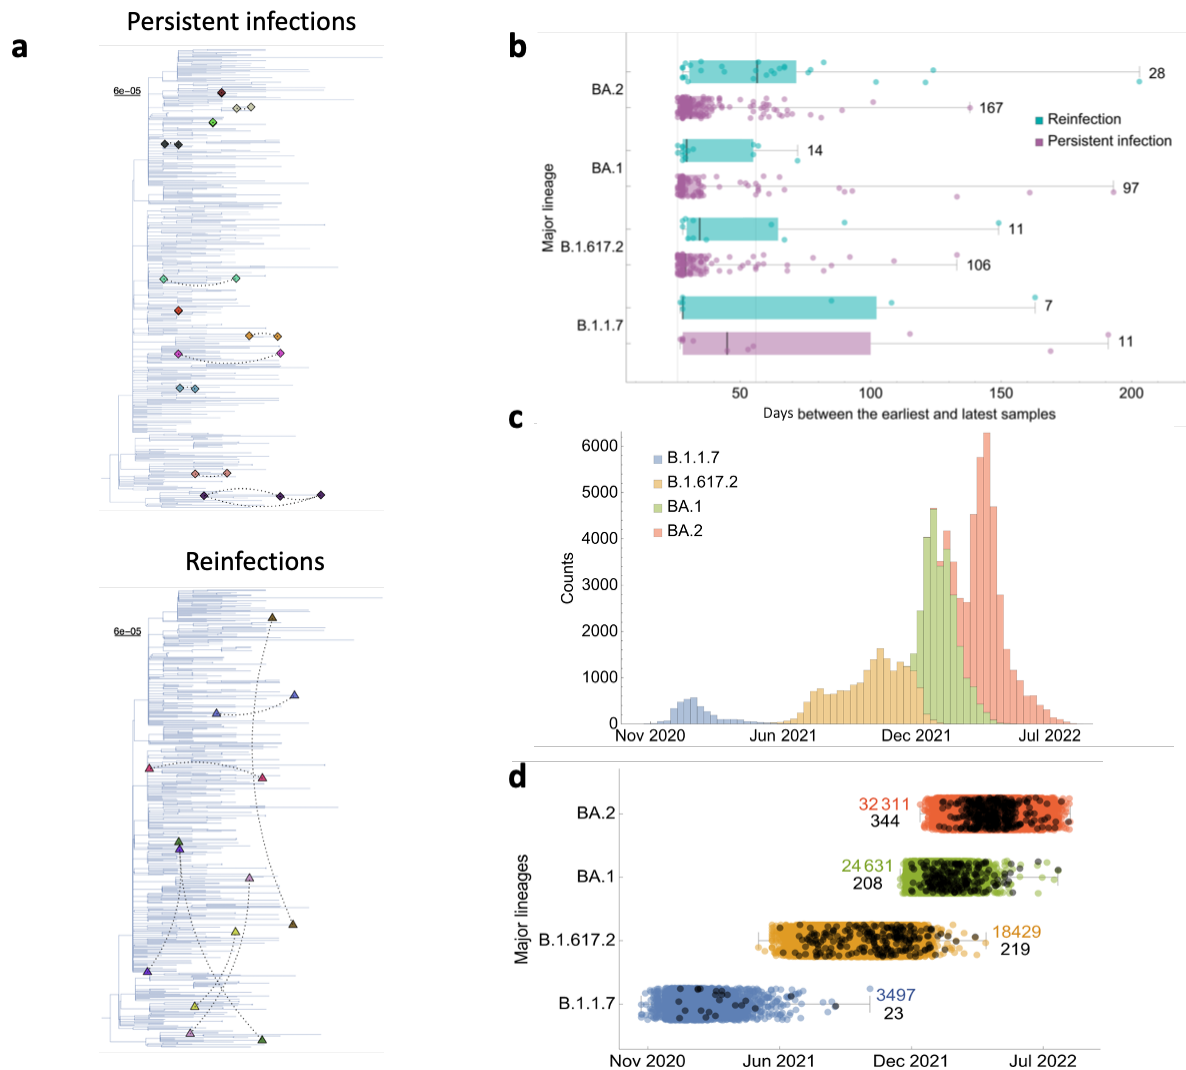

725  
726  
727  
728  
729  
730  
731  
732  
733  
734  
735  
736  
737  
738  
739  
740  
741

**Figure 1: Individuals identified with persistent infections and reinfections within the ONS-CIS. (a)** Phylogenetic relationship between samples from persistent infections and reinfections with a representative background population of Alpha (see **Supplementary Figure 2** for the analysis on the other three major lineages). Dashed lines connect every pair of sequences from the same individual. Pairs from persistent infections cluster closely together while reinfections do not. All sequences from the same individual are given the same colour. **(b)** Days between the earliest and latest genomic samples from persistent infections and reinfections. Each point represents a single individual. Solid vertical lines show the 26- and 56-day cutoffs. Numbers on the side of each box shows the total counts per category for each major lineage. **(c)** Total number of sequences in the ONS-CIS per major lineage over time. **(d)** Timing of persistent infections (black) during the UK epidemic. Some persistent infections can be identified up to weeks after the lineage has been replaced at the population level. The numbers on the side of each box shows the total sequence counts for each category.

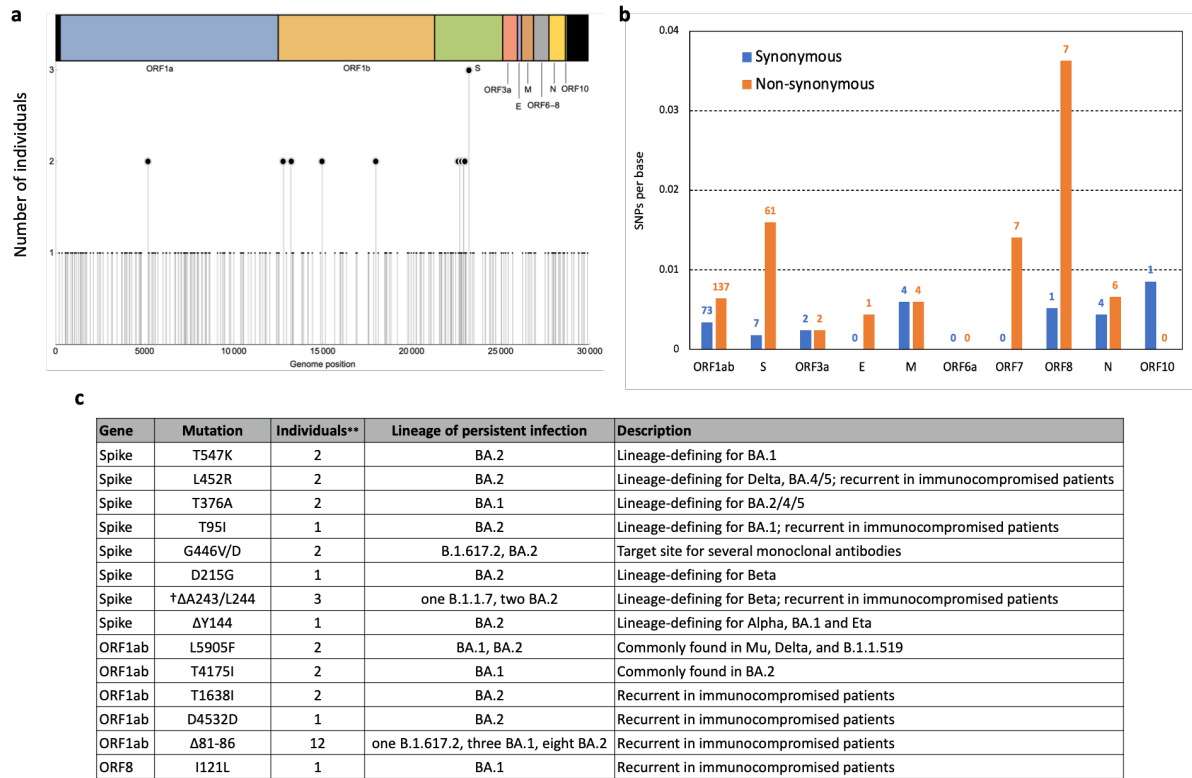

742  
743

744 **Figure 2: Distribution of single nucleotide polymorphisms and non-synonymous vs.**  
 745 **synonymous mutations detected during persistent infections. (a)** Frequency of  
 746 mutations that resulted in a SNP change during one or more persistent infections. **(b)**  
 747 Number of synonymous (blue) and non-synonymous (orange) mutations per gene during  
 748 persistent infections. Numbers on each column show the total counts of SNPs in each  
 749 category of mutations. **(c)** Description of recurrent mutations and deletions identified during  
 750 persistent infections. See **Supplementary Table 1** for information about other mutations.

751 \*\*None of the recurrent mutations were from households with other infections.

752 †Δ represents a deletion

753

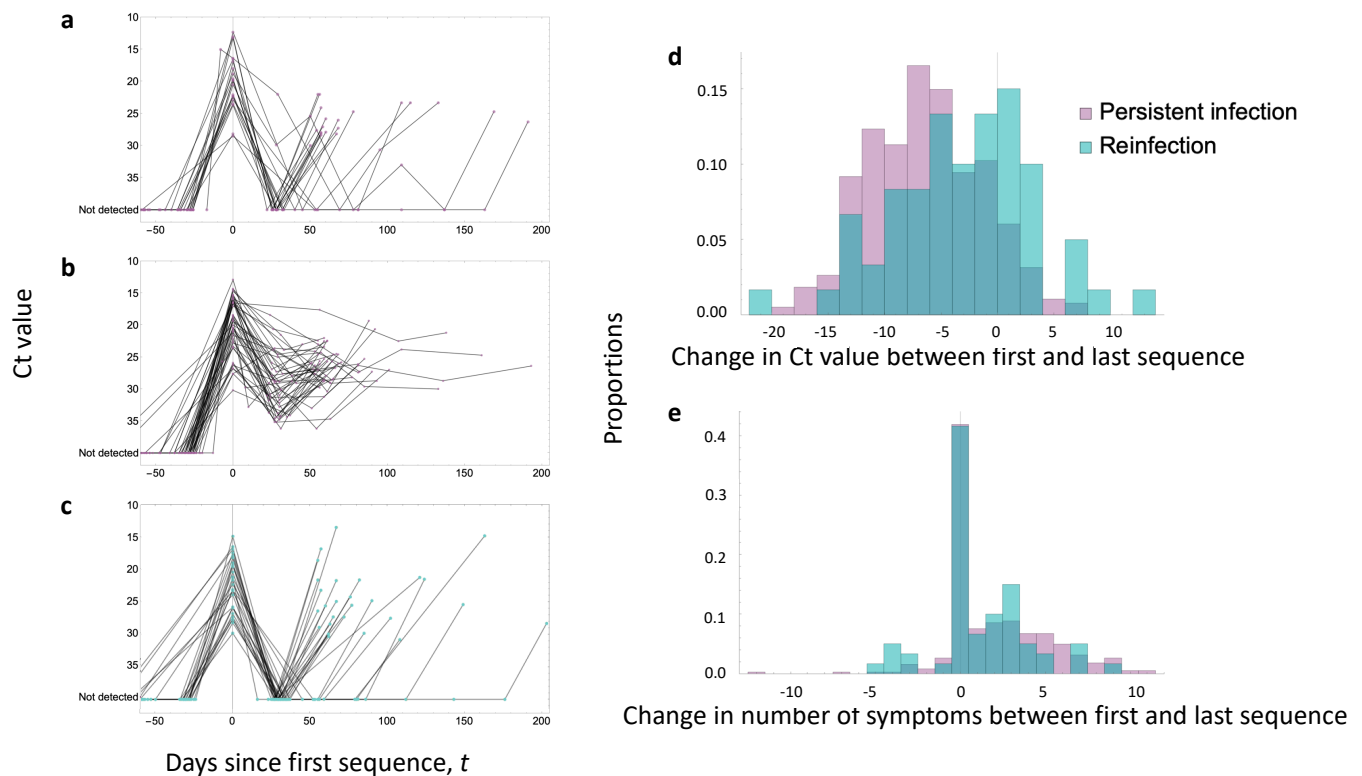

754

755

756

757

758

759

760

761

762

763

764

765

766

767

768

769

770

771

772

773

**Figure 3: Comparison of viral load dynamics and number of reported symptoms**

**during persistent infections and reinfections.**

Viral load trajectories of persistent infections with (a) relapsing and (b) chronic persistent infections and (c) reinfections with at least three PCR tests taken over the course of infection/until reinfection. (d) Change in cycle threshold (Ct) value and (e) total number of symptoms reported between the first and last time points with sequenced samples for all 381 persistent infections (purple) and 60 reinfections (cyan). Viral load at the last time point is significantly lower for persistent infections with Ct value being more than +6.7 (IQR: +3.2,+10.2) units higher at the last time point (paired t-test  $p < 10^{-8}$ ). The difference is less pronounced for reinfections with +2.5 (IQR: -1.1, +7.4) units difference between primary infection and reinfections (paired t-test  $p = 0.0003$ ). Similarly, persistently infected individuals tend to report fewer number of symptoms at the later stages of their infection compared to reinfections in the last 7 days at the last time point (at which a sequence was obtained) when compared to the first. On average, persistently infected individuals report two more symptoms at the time of their first sequenceable sample (virus samples with a positive  $Ct \leq 30$ ) relative to their last sample, with a median of 1 (IQR: 0, 4) fewer reported symptoms (paired Wilcoxon  $p < 10^{-29}$ ), while reinfected individuals report only one more symptom at the point of primary infection relative to reinfection, with a median of 0 (IQR: 0, 3) fewer reported symptoms (paired Wilcoxon  $p = 0.005$ ).

774 **Supplementary figures**

775

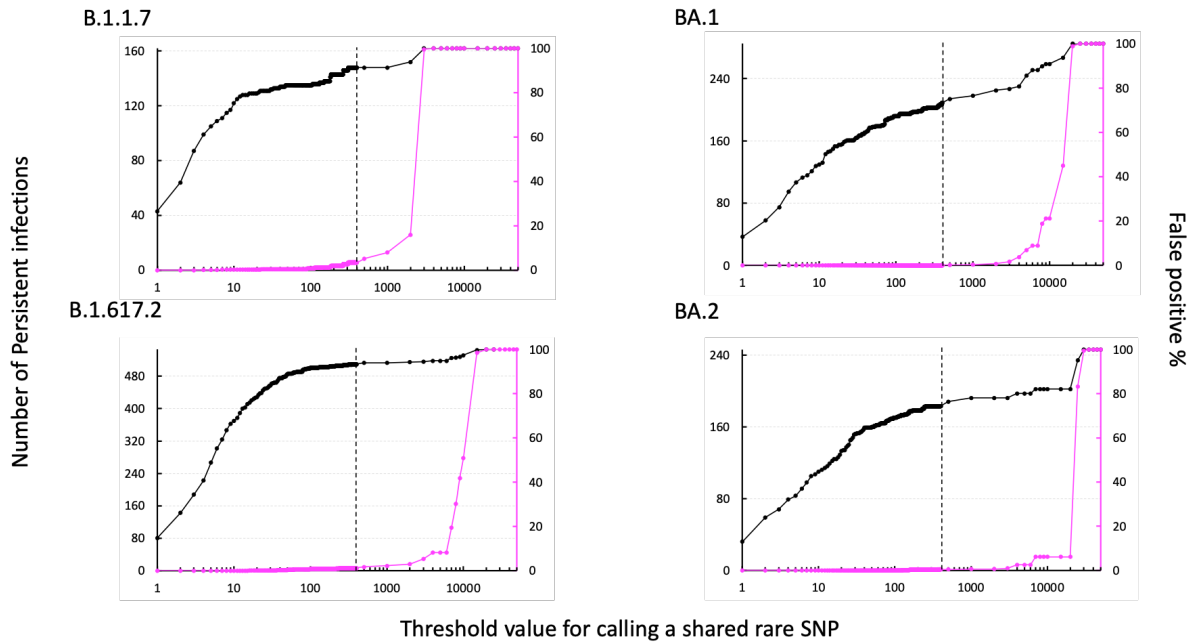

776

777

778

779

780

781

782

783

784

785

786

787

**Supplementary Figure 1: Number of persistent infections identified with a shared rare SNP as a function of the threshold for calling a rare SNP.** Threshold value of 1 for rare SNPs implies the rare SNP is only found in one sequence of that lineage in the ONS-CIS dataset, excluding sequences from any persistently infected individuals. As the threshold value for calling a rare SNP increases, the number of persistent infections (of any duration) identified (black) increases until at some point the threshold value becomes so high that any individual with two or more sequences of the same major lineage would be identified as a persistent infection based on the rare SNP criterion at which point the false positivity rate (magenta) reaches 100%. At threshold value 400 (vertical dashed line) chosen in this study for identifying persistent infections, the percentage of false positives are 0% for BA.1 and BA.2 and 3% for Alpha and Delta.



**a**

**Persistent infections**

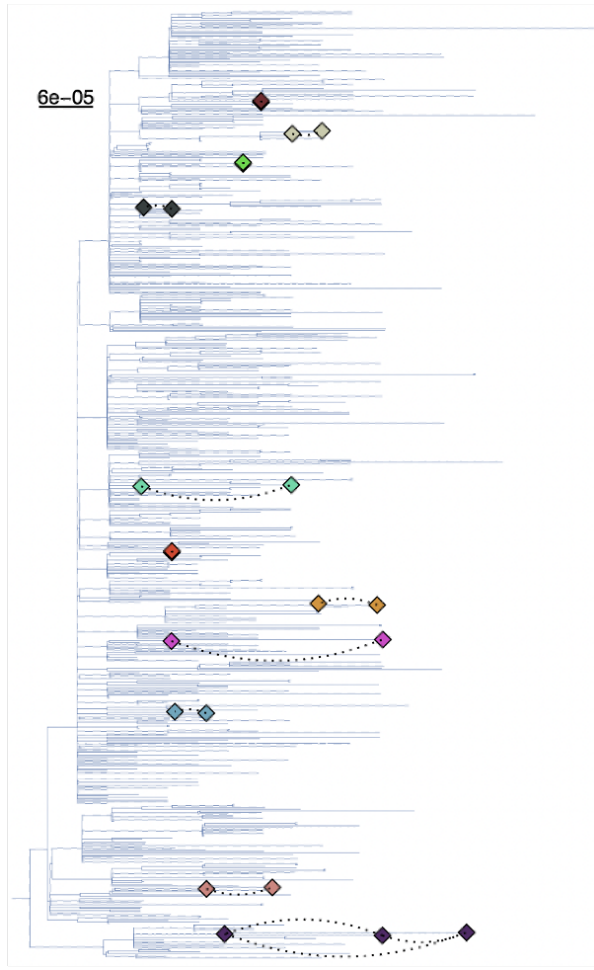

**Reinfections**

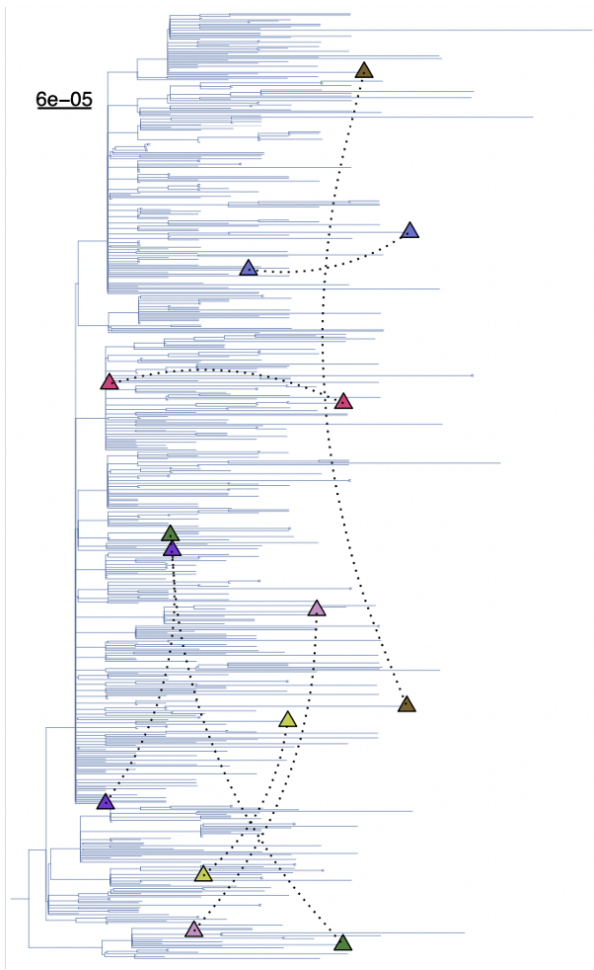

**b**

**Persistent infections**

**Reinfections**

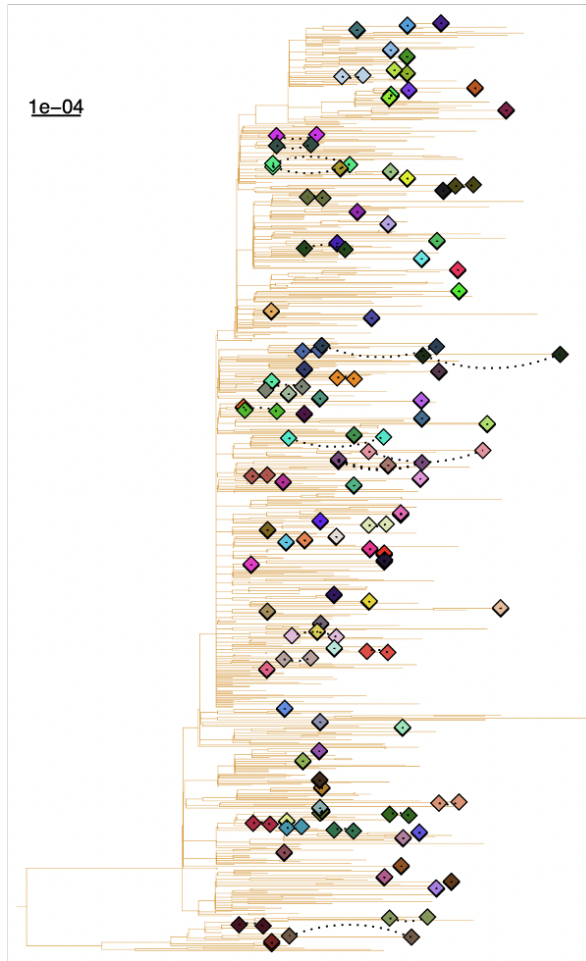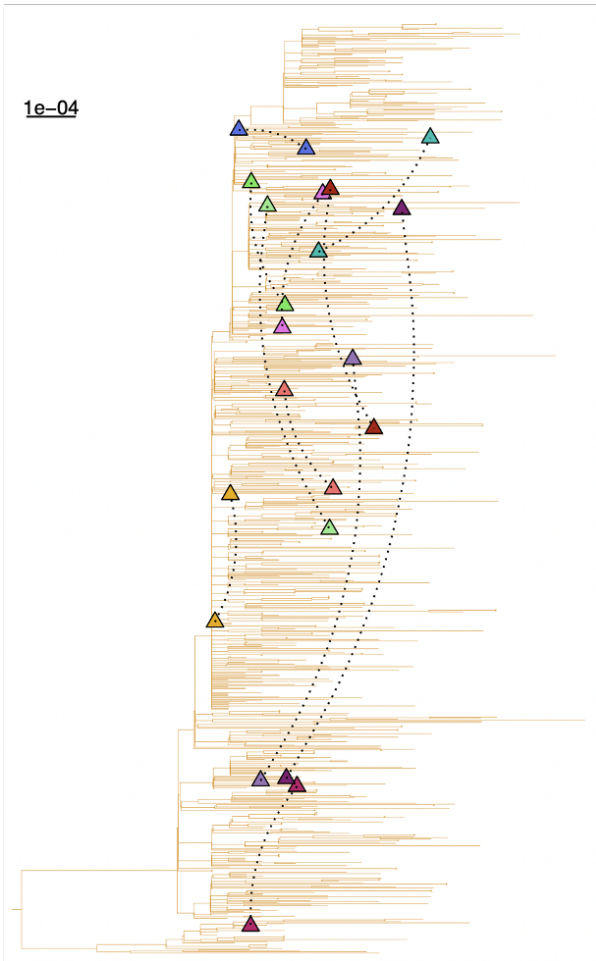

**C** Persistent infections

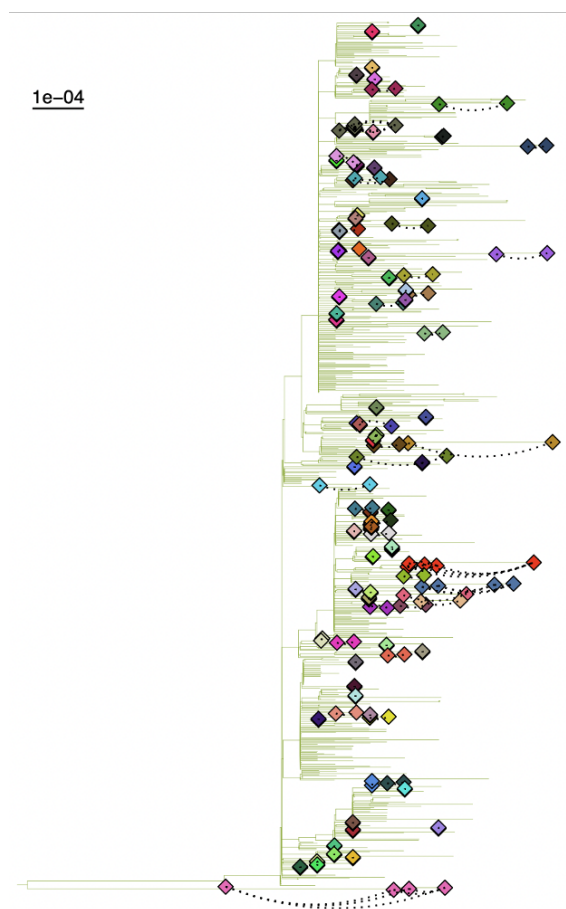

Reinfections

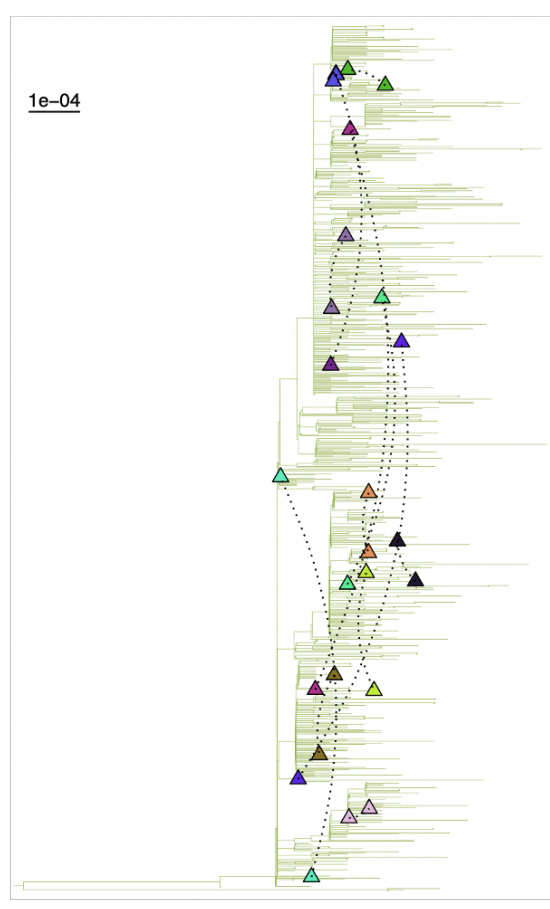

**d** Persistent infections

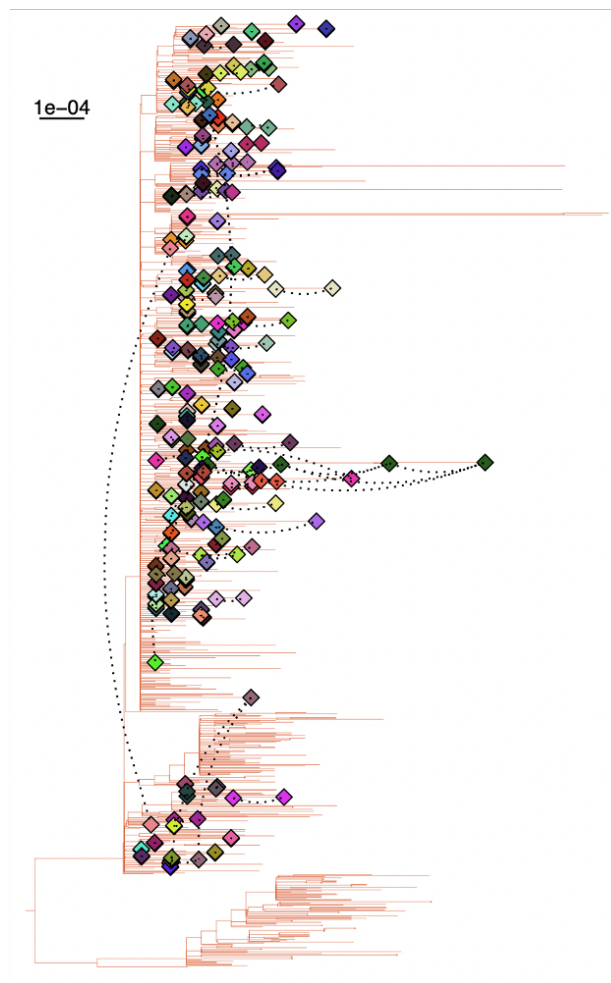

Reinfections

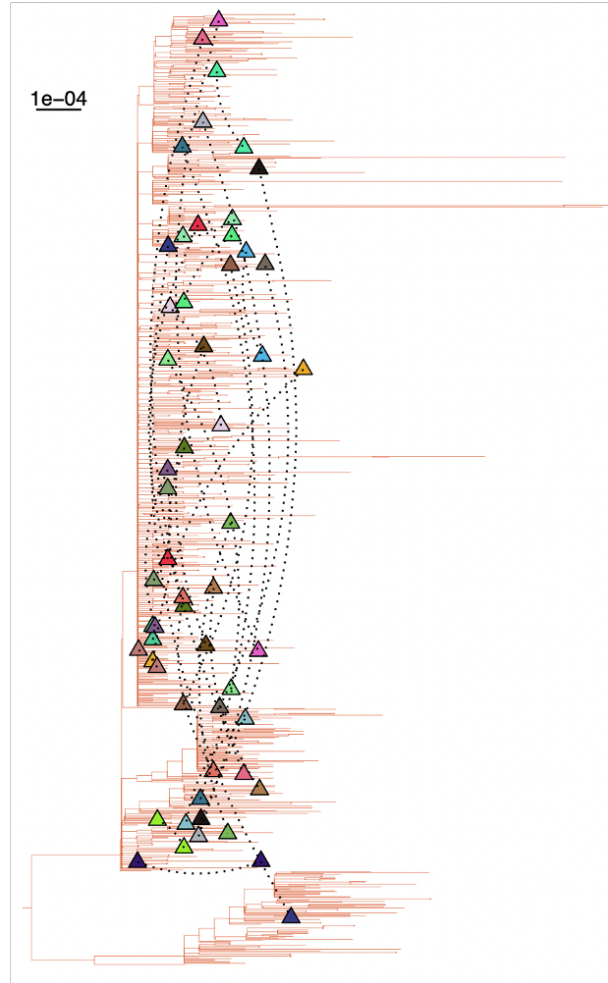

791  
792

793 **Supplementary Figure 2: Phylogenetic relationship between samples from persistent**  
794 **infections and a representative background population per major lineage.** Dashed lines  
795 connect every pair of sequences from the same individual. All sequences from the same  
796 individual are given the same colour. Pairs of sequences for (a) Alpha, (b) Delta, (c)  
797 Omicron BA.1, and (d) Omicron BA.2 that belong to persistent infections cluster closely  
798 together while reinfections do not. However, some of the sequences in 2 (out of 97)  
799 persistent infections with BA.1 and 5 (out of 167) persistent infections with BA.2 have poor  
800 bootstrap support (<80) and do not cluster together or cluster in a basal sister relationship. In  
801 all of these 7 cases, at least one of the sequences from each individual has a Ct value close  
802 to 30 with poor coverage. On the other hand, all sequences that belong to the same  
803 individual and have strong bootstrap support (>80) cluster together.

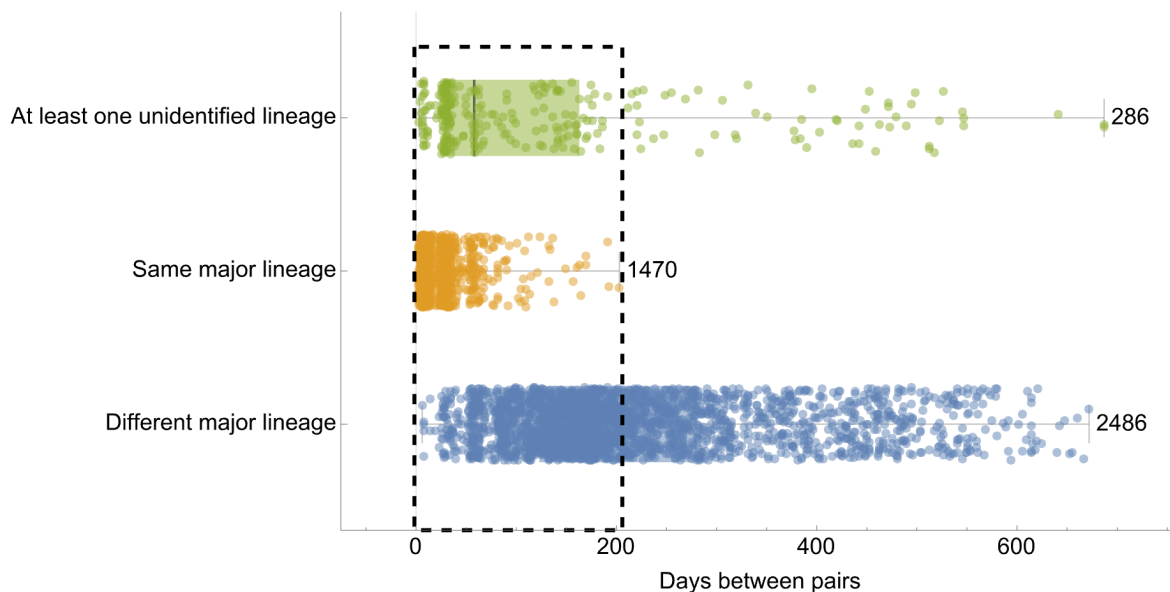

804

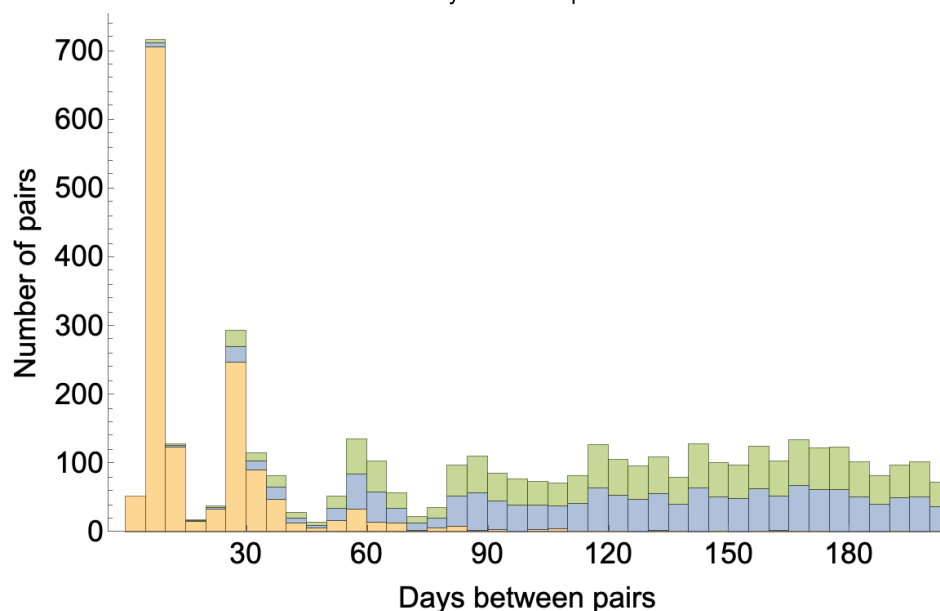

805

806

807

808

809

810

811

812

813

814

815

**Supplementary Figure 3: Days between all pairs of sequences from the same individual with two or more sequences.** Pairs of sequences are classified as (i) pairs with at least one unidentified Pango lineage (green), (ii) pairs with identical major lineage (orange), and (iii) pairs from different major lineages. Bottom panel shows the counts of pairs in each of these three categories for the first 200-day time span (highlighted in a dashed rectangle in the top panel). Pairs include all possible combinations of sequences from the same individual. The number of pairs peaks at the 7-, 30-, and 60-day periods due to the sampling frequency of ONS-CIS (see **Methods**). Note that pairs with identical major lineage may not necessarily have identical Pango lineages (see **Methods**).

816 a

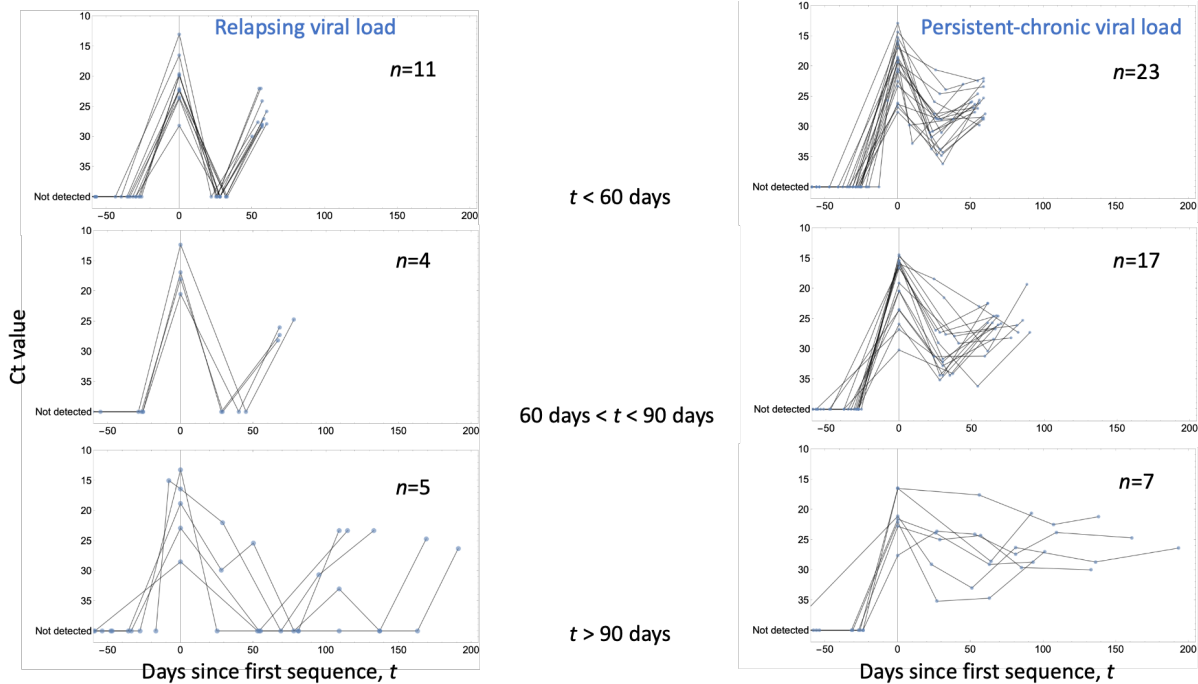

817  
818  
819

b

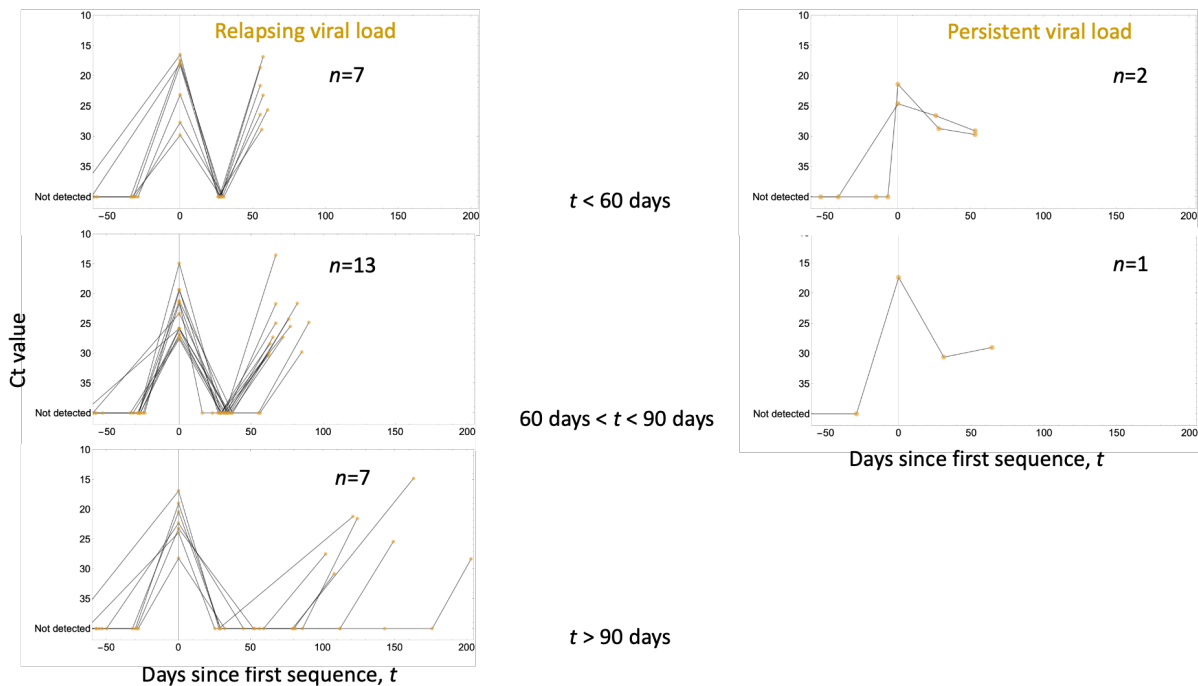

820

821 **Supplementary Figure 4: Viral load dynamics of individuals identified with persistent**  
 822 **infections and reinfections stratified by duration and viral activity.** Viral load activities of  
 823 individuals, with 3 or more PCR tests taken during infection/until reinfection, identified as  
 824 having (a) persistent infections and (b) reinfections with relapsing (left column) and  
 825 persistent chronic (right column) trajectories. Three reinfections (two occurring in  $< 60$  days  
 826 and one between 60 to 90 days since first sequence) with persistent chronic viral load  
 827 dynamics are excluded from the reinfection group as they are deemed potential persistent  
 828 infections which do not have rare SNPs.

B.1.1.7

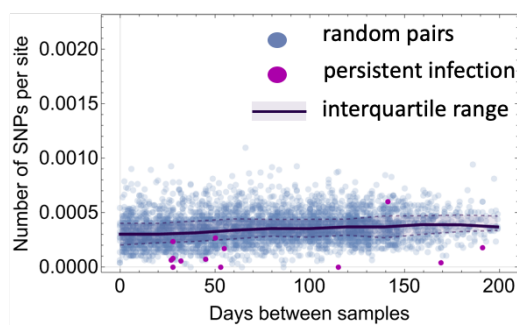

BA.1

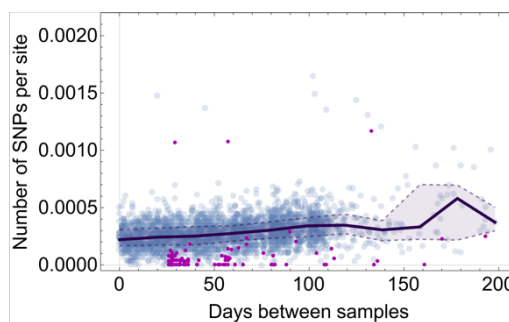

B.1.617.2

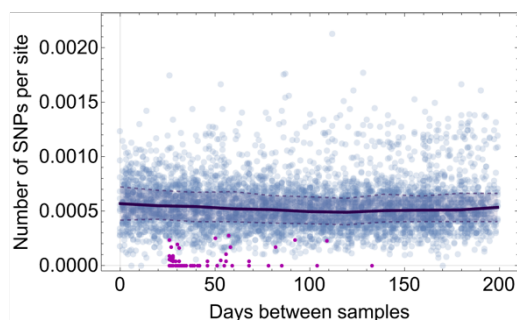

BA.2

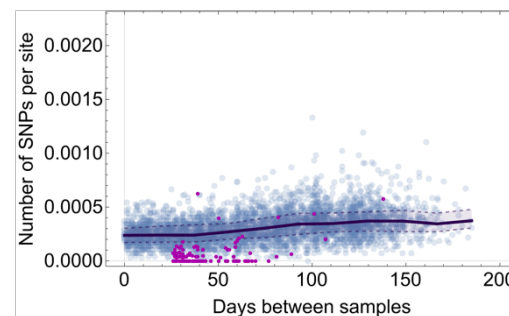

829

830

831

832

833

834

835

836

837

838

839

840

841

842

843

**Supplementary Figure 5: Number of single nucleotide polymorphisms detected in pairs of sequences from persistent infections vs. random pairs from a representative background population.** Number of Single Nucleotide Variants (SNVs) per site between all the sequences collected from persistent infections (purple) and random pairs from individuals with only a single sequence within the ONS-CIS (blue) as a function of the number of days between each pair. For each major lineage, a pool of sequences from individuals with only one sequence within the ONS-CIS was sub-sampled and 500 random pairs generated for every 20 additional days between samples. For some major lineages where there were fewer than 500 pairs available beyond a certain time point, all possible random pairs within that 20-day period are used. Solid line and shaded area show the median and interquartile range, respectively, for random pairs over time. Note that the line and shaded area in each graph does not represent the rate of evolution but can be deemed as a measure of lineage diversity as a function of time difference between samples.

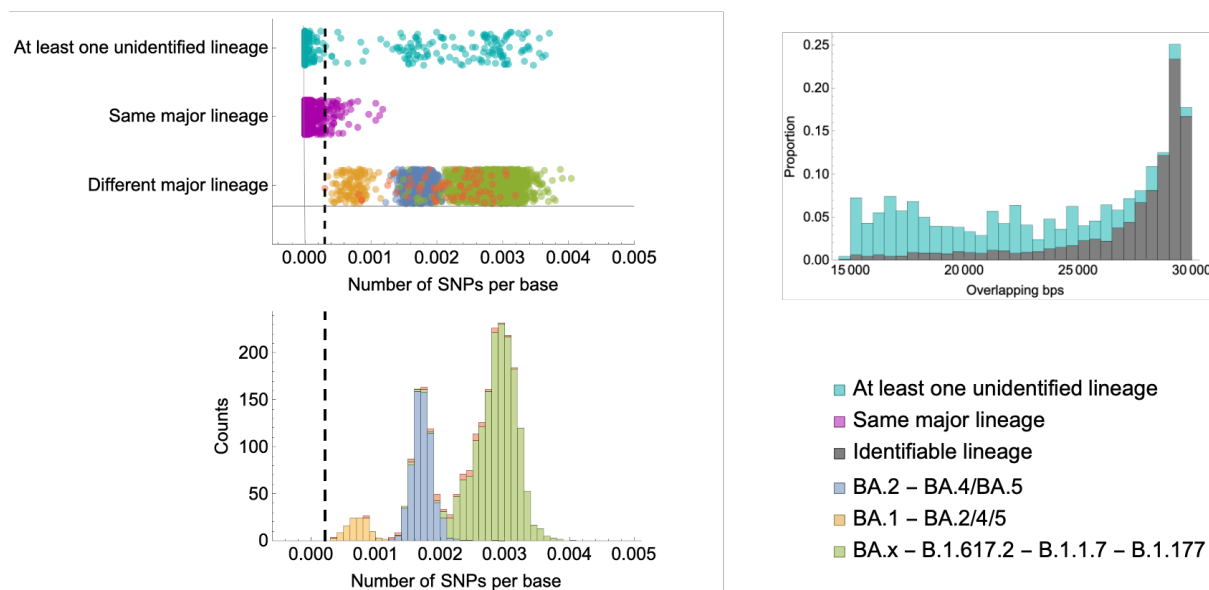

844  
845

846 **Supplementary Figure 6: Pairwise differences between sequences from individuals**  
847 **with two or more sequences.** (Left column) Number of single nucleotide polymorphisms  
848 (SNPs) between pairs of sequences from each individual with two or more sequences. Pairs  
849 include all possible combinations of sequences from the same individual. Vertical dashed  
850 line shows the lowest number of SNPs per base for pairs with different major lineages. Any  
851 pair with at least one unidentified lineage with a SNP per base smaller than the dashed line  
852 is selected as a candidate pair from a persistent infection. Pairs with different major lineages  
853 are coloured based on their number of SNPs per base into three groups: (i) pairs with one  
854 BA.1 and one BA.2 or BA.4 or BA.5 sequence (orange); (ii) pairs with one BA.2 and one  
855 BA.4 or BA.5 sequence (blue); and (iii) pairs with one Omicron (including all BA.x lineages)  
856 and one Delta (B.1.617.2), Alpha (B.1.1.7), or B.1.177 sequence (green). (Right column)  
857 Proportion of sequences with different number overlapping base pairs. Those with at least  
858 one unidentified lineage have a lower number of overlapping base pairs relative to pairs with  
859 identifiable lineage (i.e. pairs with identical or different major lineage) mainly due to having  
860 lower coverage.  
861



862 **The COVID-19 Genomics UK (COG-UK) consortium**

863 **June 2021 V.1**

864

865 Funding acquisition, Leadership and supervision, Metadata curation, Project administration,  
866 Samples and logistics, Sequencing and analysis, Software and analysis tools, and  
867 Visualisation:

868 Dr Samuel C Robson PhD <sup>13, 84</sup>

869

870 Funding acquisition, Leadership and supervision, Metadata curation, Project administration,  
871 Samples and logistics, Sequencing and analysis, and Software and analysis tools:

872 Dr Thomas R Connor PhD <sup>11, 74</sup> and Prof Nicholas J Loman PhD <sup>43</sup>

873

874 Leadership and supervision, Metadata curation, Project administration, Samples and  
875 logistics, Sequencing and analysis, Software and analysis tools, and Visualisation:

876 Dr Tanya Golubchik PhD <sup>5</sup>

877

878 Funding acquisition, Leadership and supervision, Metadata curation, Samples and logistics,  
879 Sequencing and analysis, and Visualisation:

880 Dr Rocio T Martinez Nunez PhD <sup>46</sup>

881

882 Funding acquisition, Leadership and supervision, Project administration, Samples and  
883 logistics, Sequencing and analysis, and Software and analysis tools:

884 Dr David Bonsall PhD <sup>5</sup>

885

886 Funding acquisition, Leadership and supervision, Project administration, Sequencing and  
887 analysis, Software and analysis tools, and Visualisation:

888 Prof Andrew Rambaut DPhil <sup>104</sup>

889

890 Funding acquisition, Metadata curation, Project administration, Samples and logistics,  
891 Sequencing and analysis, and Software and analysis tools:

892 Dr Luke B Snell MSc, MBBS <sup>12</sup>

893

894 Leadership and supervision, Metadata curation, Project administration, Samples and  
895 logistics, Software and analysis tools, and Visualisation:

896 Rich Livett MSc <sup>116</sup>

897

898 Funding acquisition, Leadership and supervision, Metadata curation, Project administration,  
899 and Samples and logistics:

900 Dr Catherine Ludden PhD <sup>20, 70</sup>

901

902 Funding acquisition, Leadership and supervision, Metadata curation, Samples and logistics,  
903 and Sequencing and analysis:

904 Dr Sally Corden PhD <sup>74</sup> and Dr Eleni Nastouli FRCPATH <sup>96, 95, 30</sup>

905

906 Funding acquisition, Leadership and supervision, Metadata curation, Sequencing and  
907 analysis, and Software and analysis tools:

908 Dr Gaia Nebbia PhD, FRCPATH <sup>12</sup>

909  
910 Funding acquisition, Leadership and supervision, Project administration, Samples and  
911 logistics, and Sequencing and analysis:  
912 Ian Johnston BSc <sup>116</sup>  
913  
914 Leadership and supervision, Metadata curation, Project administration, Samples and  
915 logistics, and Sequencing and analysis:  
916 Prof Katrina Lythgoe PhD <sup>5</sup>, Dr M. Estee Torok FRCP <sup>19, 20</sup> and Prof Ian G Goodfellow PhD <sup>24</sup>  
917 Leadership and supervision, Metadata curation, Project administration, Samples and  
918 logistics, and Visualisation:  
919 Dr Jacqui A Prieto PhD <sup>97, 82</sup> and Dr Kordo Saeed MD, FRCPATH <sup>97, 83</sup>  
920  
921 Leadership and supervision, Metadata curation, Project administration, Sequencing and  
922 analysis, and Software and analysis tools:  
923 Dr David K Jackson PhD <sup>116</sup>  
924  
925 Leadership and supervision, Metadata curation, Samples and logistics, Sequencing and  
926 analysis, and Visualisation:  
927 Dr Catherine Houlihan PhD <sup>96, 94</sup>  
928  
929 Leadership and supervision, Metadata curation, Sequencing and analysis, Software and  
930 analysis tools, and Visualisation:  
931 Dr Dan Frampton PhD <sup>94, 95</sup>  
932  
933 Metadata curation, Project administration, Samples and logistics, Sequencing and analysis,  
934 and Software and analysis tools:  
935 Dr William L Hamilton PhD <sup>19</sup> and Dr Adam A Witney PhD <sup>41</sup>  
936  
937 Funding acquisition, Samples and logistics, Sequencing and analysis, and Visualisation:  
938 Dr Giselda Bucca PhD <sup>101</sup>  
939  
940 Funding acquisition, Leadership and supervision, Metadata curation, and Project  
941 administration:  
942 Dr Cassie F Pope PhD<sup>40, 41</sup>  
943  
944 Funding acquisition, Leadership and supervision, Metadata curation, and Samples and  
945 logistics:  
946 Dr Catherine Moore PhD <sup>74</sup>  
947  
948 Funding acquisition, Leadership and supervision, Metadata curation, and Sequencing and  
949 analysis:  
950 Prof Emma C Thomson PhD, FRCP <sup>53</sup>  
951  
952 Funding acquisition, Leadership and supervision, Project administration, and Samples and  
953 logistics:  
954 Dr Ewan M Harrison PhD <sup>116, 102</sup>  
955  
956 Funding acquisition, Leadership and supervision, Sequencing and analysis, and

957 Visualisation:  
958 Prof Colin P Smith PhD <sup>101</sup>  
959  
960 Leadership and supervision, Metadata curation, Project administration, and Sequencing and  
961 analysis:  
962 Fiona Rogan BSc <sup>77</sup>  
963  
964 Leadership and supervision, Metadata curation, Project administration, and Samples and  
965 logistics:  
966 Shaun M Beckwith MSc <sup>6</sup>, Abigail Murray Degree <sup>6</sup>, Dawn Singleton HNC <sup>6</sup>, Dr Kirstine  
967 Eastick PhD, FRCPath <sup>37</sup>, Dr Liz A Sheridan PhD <sup>98</sup>, Paul Randell MSc, PgD <sup>99</sup>, Dr Leigh M  
968 Jackson PhD <sup>105</sup>, Dr Cristina V Ariani PhD <sup>116</sup> and Dr Sónia Gonçalves PhD <sup>116</sup>  
969  
970 Leadership and supervision, Metadata curation, Samples and logistics, and Sequencing and  
971 analysis:  
972 Dr Derek J Fairley PhD <sup>3, 77</sup>, Prof Matthew W Loose PhD <sup>18</sup> and Joanne Watkins MSc <sup>74</sup>  
973  
974  
975 Leadership and supervision, Metadata curation, Samples and logistics, and Visualisation:  
976 Dr Samuel Moses MD <sup>25, 106</sup>  
977  
978 Leadership and supervision, Metadata curation, Sequencing and analysis, and Software and  
979 analysis tools:  
980 Dr Sam Nicholls PhD <sup>43</sup>, Dr Matthew Bull PhD <sup>74</sup> and Dr Roberto Amato PhD <sup>116</sup>  
981  
982 Leadership and supervision, Project administration, Samples and logistics, and Sequencing  
983 and analysis:  
984 Prof Darren L Smith PhD <sup>36, 65, 66</sup>  
985  
986 Leadership and supervision, Sequencing and analysis, Software and analysis tools, and  
987 Visualisation:  
988 Prof David M Aanensen PhD <sup>14, 116</sup> and Dr Jeffrey C Barrett PhD <sup>116</sup>  
989  
990 Metadata curation, Project administration, Samples and logistics, and Sequencing and  
991 analysis:  
992 Dr Dinesh Aggarwal MRCP<sup>20, 116, 70</sup>, Dr James G Shepherd MBCHB, MRCP <sup>53</sup>, Dr Martin D  
993 Curran PhD <sup>71</sup> and Dr Surendra Parmar PhD <sup>71</sup>  
994  
995 Metadata curation, Project administration, Sequencing and analysis, and Software and  
996 analysis tools:  
997 Dr Matthew D Parker PhD <sup>109</sup>  
998  
999 Metadata curation, Samples and logistics, Sequencing and analysis, and Software and  
1000 analysis tools:  
1001 Dr Catryn Williams PhD <sup>74</sup>  
1002  
1003 Metadata curation, Samples and logistics, Sequencing and analysis, and Visualisation:  
1004 Dr Sharon Glaysher PhD <sup>68</sup>

- 1005
- 1006 Metadata curation, Sequencing and analysis, Software and analysis tools, and Visualisation:
- 1007 Dr Anthony P Underwood PhD <sup>14, 116</sup>, Dr Matthew Bashton PhD <sup>36, 65</sup>, Dr Nicole Pacchiarini
- 1008 PhD <sup>74</sup>, Dr Katie F Loveson PhD <sup>84</sup> and Matthew Byott MSc <sup>95, 96</sup>
- 1009
- 1010 Project administration, Sequencing and analysis, Software and analysis tools, and
- 1011 Visualisation:
- 1012 Dr Alessandro M Carabelli PhD <sup>20</sup>
- 1013
- 1014 Funding acquisition, Leadership and supervision, and Metadata curation:
- 1015 Dr Kate E Templeton PhD <sup>56, 104</sup>
- 1016
- 1017 Funding acquisition, Leadership and supervision, and Project administration:
- 1018 Dr Thushan I de Silva PhD <sup>109</sup>, Dr Dennis Wang PhD <sup>109</sup>, Dr Cordelia F Langford PhD <sup>116</sup> and
- 1019 John Sillitoe BEng <sup>116</sup>
- 1020
- 1021 Funding acquisition, Leadership and supervision, and Samples and logistics:
- 1022 Prof Rory N Gunson PhD, FRCPATH <sup>55</sup>
- 1023
- 1024 Funding acquisition, Leadership and supervision, and Sequencing and analysis:
- 1025 Dr Simon Cottrell PhD <sup>74</sup>, Dr Justin O'Grady PhD <sup>75, 103</sup> and Prof Dominic Kwiatkowski PhD
- 1026 <sup>116, 108</sup>
- 1027
- 1028 Leadership and supervision, Metadata curation, and Project administration:
- 1029 Dr Patrick J Lillie PhD, FRCP <sup>37</sup>
- 1030
- 1031 Leadership and supervision, Metadata curation, and Samples and logistics:
- 1032 Dr Nicholas Cortes MBChB <sup>33</sup>, Dr Nathan Moore MBChB <sup>33</sup>, Dr Claire Thomas DPhil <sup>33</sup>,
- 1033 Phillipa J Burns MSc, DipRCPATH <sup>37</sup>, Dr Tabitha W Mahungu FRCPATH <sup>80</sup> and Steven Liggett
- 1034 BSc <sup>86</sup>
- 1035
- 1036 Leadership and supervision, Metadata curation, and Sequencing and analysis:
- 1037 Angela H Beckett MSc <sup>13, 81</sup> and Prof Matthew TG Holden PhD <sup>73</sup>
- 1038
- 1039 Leadership and supervision, Project administration, and Samples and logistics:
- 1040 Dr Lisa J Levett PhD <sup>34</sup>, Dr Husam Osman PhD <sup>70, 35</sup> and Dr Mohammed O Hassan-Ibrahim
- 1041 PhD, FRCPATH <sup>99</sup>
- 1042
- 1043 Leadership and supervision, Project administration, and Sequencing and analysis:
- 1044 Dr David A Simpson PhD <sup>77</sup>
- 1045
- 1046 Leadership and supervision, Samples and logistics, and Sequencing and analysis:
- 1047 Dr Meera Chand PhD <sup>72</sup>, Prof Ravi K Gupta PhD <sup>102</sup>, Prof Alistair C Darby PhD <sup>107</sup> and Prof
- 1048 Steve Paterson PhD <sup>107</sup>
- 1049
- 1050 Leadership and supervision, Sequencing and analysis, and Software and analysis tools:
- 1051 Prof Oliver G Pybus DPhil <sup>23</sup>, Dr Erik M Volz PhD <sup>39</sup>, Prof Daniela de Angelis PhD <sup>52</sup>, Prof
- 1052 David L Robertson PhD <sup>53</sup>, Dr Andrew J Page PhD <sup>75</sup> and Dr Inigo Martincorena PhD <sup>116</sup>

- 1053
- 1054 Leadership and supervision, Sequencing and analysis, and Visualisation:  
1055 Dr Louise Aigrain PhD <sup>116</sup> and Dr Andrew R Bassett PhD <sup>116</sup>  
1056
- 1057 Metadata curation, Project administration, and Samples and logistics:  
1058 Dr Nick Wong DPhil, MRCP, FRCPath <sup>50</sup>, Dr Yusri Taha MD, PhD <sup>89</sup>, Michelle J Erkiert BA <sup>99</sup>  
1059 and Dr Michael H Spencer Chapman MBBS <sup>116, 102</sup>  
1060
- 1061 Metadata curation, Project administration, and Sequencing and analysis:  
1062 Dr Rebecca Dewar PhD <sup>56</sup> and Martin P McHugh MSc <sup>56, 111</sup>  
1063
- 1064 Metadata curation, Project administration, and Software and analysis tools:  
1065 Siddharth Mookerjee MPH <sup>38, 57</sup>  
1066
- 1067 Metadata curation, Project administration, and Visualisation:  
1068 Stephen Aplin <sup>97</sup>, Matthew Harvey <sup>97</sup>, Thea Sass <sup>97</sup>, Dr Helen Umpleby FRCP <sup>97</sup> and Helen  
1069 Wheeler <sup>97</sup>  
1070
- 1071 Metadata curation, Samples and logistics, and Sequencing and analysis:  
1072 Dr James P McKenna PhD <sup>3</sup>, Dr Ben Warne MRCP <sup>9</sup>, Joshua F Taylor MSc <sup>22</sup>, Yasmin  
1073 Chaudhry BSc <sup>24</sup>, Rhys Izuagbe <sup>24</sup>, Dr Aminu S Jahun PhD <sup>24</sup>, Dr Gregory R Young PhD <sup>36,</sup>  
1074 <sup>65</sup>, Dr Claire McMurray PhD <sup>43</sup>, Dr Clare M McCann PhD <sup>65, 66</sup>, Dr Andrew Nelson PhD <sup>65, 66</sup>  
1075 and Scott Elliott <sup>68</sup>  
1076
- 1077 Metadata curation, Samples and logistics, and Visualisation:  
1078 Hannah Lowe MSc <sup>25</sup>  
1079
- 1080 Metadata curation, Sequencing and analysis, and Software and analysis tools:  
1081 Dr Anna Price PhD <sup>11</sup>, Matthew R Crown BSc <sup>65</sup>, Dr Sara Rey PhD <sup>74</sup>, Dr Sunando Roy PhD  
1082 <sup>96</sup> and Dr Ben Temperton PhD <sup>105</sup>  
1083
- 1084
- 1085 Metadata curation, Sequencing and analysis, and Visualisation:  
1086 Dr Sharif Shaaban PhD <sup>73</sup> and Dr Andrew R Hesketh PhD <sup>101</sup>  
1087
- 1088 Project administration, Samples and logistics, and Sequencing and analysis:  
1089 Dr Kenneth G Laing PhD<sup>41</sup>, Dr Irene M Monahan PhD <sup>41</sup> and Dr Judith Heaney PhD <sup>95, 96, 34</sup>  
1090
- 1091 Project administration, Samples and logistics, and Visualisation:  
1092 Dr Emanuela Pelosi FRCPath <sup>97</sup>, Siona Silveira MSc <sup>97</sup> and Dr Eleri Wilson-Davies MD,  
1093 FRCPath <sup>97</sup>  
1094
- 1095 Samples and logistics, Software and analysis tools, and Visualisation:  
1096 Dr Helen Fryer PhD <sup>5</sup>  
1097
- 1098 Sequencing and analysis, Software and analysis tools, and Visualization:  
1099 Dr Helen Adams PhD <sup>4</sup>, Dr Louis du Plessis PhD <sup>23</sup>, Dr Rob Johnson PhD <sup>39</sup>, Dr William T  
1100 Harvey PhD <sup>53, 42</sup>, Dr Joseph Hughes PhD <sup>53</sup>, Dr Richard J Orton PhD <sup>53</sup>, Dr Lewis G Spurgin

1101 PhD <sup>59</sup>, Dr Yann Bourgeois PhD <sup>81</sup>, Dr Chris Ruis PhD <sup>102</sup>, Áine O'Toole MSc <sup>104</sup>, Marina  
1102 Gourtovaia MSc <sup>116</sup> and Dr Theo Sanderson PhD <sup>116</sup>  
1103  
1104 Funding acquisition, and Leadership and supervision:  
1105 Dr Christophe Fraser PhD <sup>5</sup>, Dr Jonathan Edgeworth PhD, FRCPath <sup>12</sup>, Prof Judith Breuer  
1106 MD <sup>96, 29</sup>, Dr Stephen L Mitchell PhD <sup>105</sup> and Prof John A Todd PhD <sup>115</sup>  
1107  
1108 Funding acquisition, and Project administration:  
1109 Michaela John BSc <sup>10</sup> and Dr David Buck PhD <sup>115</sup>  
1110  
1111 Leadership and supervision, and Metadata curation:  
1112 Dr Kavitha Gajee MBBS, FRCPath <sup>37</sup> and Dr Gemma L Kay PhD <sup>75</sup>  
1113  
1114 Leadership and supervision, and Project administration:  
1115 Prof Sharon J Peacock PhD <sup>20, 70</sup> and David Heyburn <sup>74</sup>  
1116  
1117 Leadership and supervision, and Samples and logistics:  
1118 Katie Kitchman BSc <sup>37</sup>, Prof Alan McNally PhD <sup>43, 93</sup>, David T Pritchard MSc, CSci <sup>50</sup>, Dr  
1119 Samir Dervisevic FRCPath <sup>58</sup>, Dr Peter Muir PhD <sup>70</sup>, Dr Esther Robinson PhD <sup>70, 35</sup>, Dr Barry  
1120 B Vipond PhD <sup>70</sup>, Newara A Ramadan MSc, CSci, FIBMS <sup>78</sup>, Dr Christopher Jeanes MBBS  
1121 <sup>90</sup>, Danni Weldon BSc <sup>116</sup>, Jana Catalan MSc <sup>118</sup> and Neil Jones MSc <sup>118</sup>  
1122  
1123 Leadership and supervision, and Sequencing and analysis:  
1124 Dr Ana da Silva Filipe PhD <sup>53</sup>, Dr Chris Williams MBBS <sup>74</sup>, Marc Fuchs BSc <sup>77</sup>, Dr Julia  
1125 Miskelly PhD <sup>77</sup>, Dr Aaron R Jeffries PhD <sup>105</sup>, Karen Oliver BSc <sup>116</sup> and Dr Naomi R Park PhD  
1126 <sup>116</sup>  
1127  
1128 Metadata curation, and Samples and logistics:  
1129 Amy Ash BSc <sup>1</sup>, Cherian Koshy MSc, CSci, FIBMS <sup>1</sup>, Magdalena Barrow <sup>7</sup>, Dr Sarah L  
1130 Buchan PhD <sup>7</sup>, Dr Anna Mantzouratou PhD <sup>7</sup>, Dr Gemma Clark PhD <sup>15</sup>, Dr Christopher W  
1131 Holmes PhD <sup>16</sup>, Sharon Campbell MSc <sup>17</sup>, Thomas Davis MSc <sup>21</sup>, Ngee Keong Tan MSc <sup>22</sup>,  
1132 Dr Julianne R Brown PhD <sup>29</sup>, Dr Kathryn A Harris PhD <sup>29, 2</sup>, Stephen P Kidd MSc <sup>33</sup>, Dr Paul  
1133 R Grant PhD <sup>34</sup>, Dr Li Xu-McCrae PhD <sup>35</sup>, Dr Alison Cox PhD <sup>38, 63</sup>, Pinglawathee Madona  
1134 <sup>38, 63</sup>, Dr Marcus Pond PhD <sup>38, 63</sup>, Dr Paul A Randell MBCh <sup>38, 63</sup>, Karen T Withell FIBMS <sup>48</sup>,  
1135 Cheryl Williams MSc <sup>51</sup>, Dr Clive Graham MD <sup>60</sup>, Rebecca Denton-Smith BSc <sup>62</sup>, Emma  
1136 Swindells BSc <sup>62</sup>, Robyn Turnbull BSc <sup>62</sup>, Dr Tim J Sloan PhD <sup>67</sup>, Dr Andrew Bosworth PhD  
1137 <sup>70, 35</sup>, Stephanie Hutchings <sup>70</sup>, Hannah M Pymont MSc <sup>70</sup>, Dr Anna Casey PhD <sup>76</sup>, Dr Liz  
1138 Ratcliffe PhD <sup>76</sup>, Dr Christopher R Jones PhD <sup>79, 105</sup>, Dr Bridget A Knight PhD <sup>79, 105</sup>, Dr  
1139 Tanzina Haque PhD, FRCPath <sup>80</sup>, Dr Jennifer Hart MRCP <sup>80</sup>, Dr Dianne Irish-Tavares  
1140 FRCPath <sup>80</sup>, Eric Witele MSc <sup>80</sup>, Craig Mower BA <sup>86</sup>, Louisa K Watson DipHE <sup>86</sup>, Jennifer  
1141 Collins BSc <sup>89</sup>, Gary Eltringham BSc <sup>89</sup>, Dorian Crudginton <sup>98</sup>, Ben Macklin <sup>98</sup>, Prof Miren  
1142 Iturriza-Gomara PhD <sup>107</sup>, Dr Anita O Lucaci PhD <sup>107</sup> and Dr Patrick C McClure PhD <sup>113</sup>  
1143  
1144 Metadata curation, and Sequencing and analysis:  
1145 Matthew Carlile BSc <sup>18</sup>, Dr Nadine Holmes PhD <sup>18</sup>, Dr Christopher Moore PhD <sup>18</sup>, Dr  
1146 Nathaniel Storey PhD <sup>29</sup>, Dr Stefan Rooke PhD <sup>73</sup>, Dr Gonzalo Yebra PhD <sup>73</sup>, Dr Noel Craine  
1147 DPhil <sup>74</sup>, Malorie Perry MSc <sup>74</sup>, Dr Nabil-Fareed Alikhan PhD <sup>75</sup>, Dr Stephen Bridgett PhD <sup>77</sup>,  
1148 Kate F Cook MScR <sup>84</sup>, Christopher Fearn MSc <sup>84</sup>, Dr Salman Goudarzi PhD <sup>84</sup>, Prof Ronan A

- 1149 Lyons MD <sup>88</sup>, Dr Thomas Williams MD <sup>104</sup>, Dr Sam T Haldenby PhD <sup>107</sup>, Jillian Durham BSc  
1150 <sup>116</sup> and Dr Steven Leonard PhD <sup>116</sup>  
1151  
1152 Metadata curation, and Software and analysis tools:  
1153 Robert M Davies MA (Cantab) <sup>116</sup>  
1154  
1155 Project administration, and Samples and logistics:  
1156 Dr Rahul Batra MD <sup>12</sup>, Beth Blane BSc <sup>20</sup>, Dr Moira J Spyer PhD <sup>30, 95, 96</sup>, Perminder Smith  
1157 MSc <sup>32, 112</sup>, Mehmet Yavus <sup>85, 109</sup>, Dr Rachel J Williams PhD <sup>96</sup>, Dr Adhyana IK Mahanama  
1158 MD <sup>97</sup>, Dr Buddhini Samaraweera MD <sup>97</sup>, Sophia T Girgis MSc <sup>102</sup>, Samantha E Hansford  
1159 CSci <sup>109</sup>, Dr Angie Green PhD <sup>115</sup>, Dr Charlotte Beaver PhD <sup>116</sup>, Katherine L Bellis <sup>116, 102</sup>,  
1160 Matthew J Dorman <sup>116</sup>, Sally Kay <sup>116</sup>, Liam Prestwood <sup>116</sup> and Dr Shavanthi Rajatileka PhD  
1161 <sup>116</sup>  
1162  
1163 Project administration, and Sequencing and analysis:  
1164 Dr Joshua Quick PhD <sup>43</sup>  
1165  
1166 Project administration, and Software and analysis tools:  
1167 Radoslaw Poplawski BSc <sup>43</sup>  
1168  
1169 Samples and logistics, and Sequencing and analysis:  
1170 Dr Nicola Reynolds PhD <sup>8</sup>, Andrew Mack MPhil <sup>11</sup>, Dr Arthur Morriss PhD <sup>11</sup>, Thomas  
1171 Whalley BSc <sup>11</sup>, Bindi Patel BSc <sup>12</sup>, Dr Iliana Georgana PhD <sup>24</sup>, Dr Myra Hosmillo PhD <sup>24</sup>,  
1172 Malte L Pinckert MPhil <sup>24</sup>, Dr Joanne Stockton PhD <sup>43</sup>, Dr John H Henderson PhD <sup>65</sup>, Amy  
1173 Hollis HND <sup>65</sup>, Dr William Stanley PhD <sup>65</sup>, Dr Wen C Yew PhD <sup>65</sup>, Dr Richard Myers PhD <sup>72</sup>,  
1174 Dr Alicia Thornton PhD <sup>72</sup>, Alexander Adams BSc <sup>74</sup>, Tara Annett BSc <sup>74</sup>, Dr Hibo Asad PhD  
1175 <sup>74</sup>, Alec Birchley MSc <sup>74</sup>, Jason Coombes BSc <sup>74</sup>, Johnathan M Evans MSc <sup>74</sup>, Laia Fina <sup>74</sup>,  
1176 Bree Gatica-Wilcox MPhil <sup>74</sup>, Lauren Gilbert <sup>74</sup>, Lee Graham BSc <sup>74</sup>, Jessica Hey BSc <sup>74</sup>,  
1177 Ember Hilvers MPH <sup>74</sup>, Sophie Jones MSc <sup>74</sup>, Hannah Jones <sup>74</sup>, Sara Kumziene-  
1178 Summerhayes MSc <sup>74</sup>, Dr Caoimhe McKerr PhD <sup>74</sup>, Jessica Powell BSc <sup>74</sup>, Georgia Pugh <sup>74</sup>,  
1179 Sarah Taylor <sup>74</sup>, Alexander J Trotter MRes <sup>75</sup>, Charlotte A Williams BSc <sup>96</sup>, Leanne M  
1180 Kermack MSc <sup>102</sup>, Benjamin H Foulkes MSc <sup>109</sup>, Marta Gallis MSc <sup>109</sup>, Hailey R Hornsby MSc  
1181 <sup>109</sup>, Stavroula F Louka MSc <sup>109</sup>, Dr Manoj Pohare PhD <sup>109</sup>, Paige Wolverson MSc <sup>109</sup>, Peijun  
1182 Zhang MSc <sup>109</sup>, George MacIntyre-Cockett BSc <sup>115</sup>, Amy Trebes MSc <sup>115</sup>, Dr Robin J Moll  
1183 PhD <sup>116</sup>, Lynne Ferguson MSc <sup>117</sup>, Dr Emily J Goldstein PhD <sup>117</sup>, Dr Alasdair Maclean PhD <sup>117</sup>  
1184 and Dr Rachael Tomb PhD <sup>117</sup>  
1185  
1186 Samples and logistics, and Software and analysis tools:  
1187 Dr Igor Starinskij MSc, MRCP <sup>53</sup>  
1188  
1189 Sequencing and analysis, and Software and analysis tools:  
1190 Laura Thomson BSc <sup>5</sup>, Joel Southgate MSc <sup>11, 74</sup>, Dr Moritz UG Kraemer DPhil <sup>23</sup>, Dr Jayna  
1191 Raghvani PhD <sup>23</sup>, Dr Alex E Zarebski PhD <sup>23</sup>, Olivia Boyd MSc <sup>39</sup>, Lily Geidelberg MSc <sup>39</sup>, Dr  
1192 Chris J Illingworth PhD <sup>52</sup>, Dr Chris Jackson PhD <sup>52</sup>, Dr David Pascall PhD <sup>52</sup>, Dr Sreenu  
1193 Vattipally PhD <sup>53</sup>, Timothy M Freeman MPhil <sup>109</sup>, Dr Sharon N Hsu PhD <sup>109</sup>, Dr Benjamin B  
1194 Lindsey MRCP <sup>109</sup>, Dr Keith James PhD <sup>116</sup>, Kevin Lewis <sup>116</sup>, Gerry Tonkin-Hill <sup>116</sup> and Dr  
1195 Jaime M Tovar-Corona PhD <sup>116</sup>  
1196

1197 Sequencing and analysis, and Visualisation:

1198 MacGregor Cox MSci <sup>20</sup>

1199

1200 Software and analysis tools, and Visualisation:

1201 Dr Khalil Abudahab PhD <sup>14, 116</sup>, Mirko Menegazzo <sup>14</sup>, Ben EW Taylor MEng <sup>14, 116</sup>, Dr Corin A

1202 Yeats PhD <sup>14</sup>, Afrida Mukaddas BTech <sup>53</sup>, Derek W Wright MSc <sup>53</sup>, Dr Leonardo de Oliveira

1203 Martins PhD <sup>75</sup>, Dr Rachel Colquhoun DPhil <sup>104</sup>, Verity Hill <sup>104</sup>, Dr Ben Jackson PhD <sup>104</sup>, Dr JT

1204 McCrone PhD <sup>104</sup>, Dr Nathan Medd PhD <sup>104</sup>, Dr Emily Scher PhD <sup>104</sup> and Jon-Paul Keatley <sup>116</sup>

1205

1206 Leadership and supervision:

1207 Dr Tanya Curran PhD <sup>3</sup>, Dr Sian Morgan FRCPATH <sup>10</sup>, Prof Patrick Maxwell PhD <sup>20</sup>, Prof Ken

1208 Smith PhD <sup>20</sup>, Dr Sahar Eldirdiri MBBS, MSc, FRCPATH <sup>21</sup>, Anita Kenyon MSc <sup>21</sup>, Prof Alison

1209 H Holmes MD <sup>38, 57</sup>, Dr James R Price PhD <sup>38, 57</sup>, Dr Tim Wyatt PhD <sup>69</sup>, Dr Alison E Mather

1210 PhD <sup>75</sup>, Dr Timofey Skvortsov PhD <sup>77</sup> and Prof John A Hartley PhD <sup>96</sup>

1211

1212 Metadata curation:

1213 Prof Martyn Guest PhD <sup>11</sup>, Dr Christine Kitchen PhD <sup>11</sup>, Dr Ian Merrick PhD <sup>11</sup>, Robert Munn

1214 BSc <sup>11</sup>, Dr Beatrice Bertolusso Degree <sup>33</sup>, Dr Jessica Lynch MBCHB <sup>33</sup>, Dr Gabrielle Vernet

1215 MBBS <sup>33</sup>, Stuart Kirk MSc <sup>34</sup>, Dr Elizabeth Wastnedge MD <sup>56</sup>, Dr Rachael Stanley PhD <sup>58</sup>,

1216 Giles Idle <sup>64</sup>, Dr Declan T Bradley PhD <sup>69, 77</sup>, Dr Jennifer Poyner MD <sup>79</sup> and Matilde Mori BSc

1217 <sup>110</sup>

1218

1219 Project administration:

1220 Owen Jones BSc <sup>11</sup>, Victoria Wright BSc <sup>18</sup>, Ellena Brooks MA <sup>20</sup>, Carol M Churcher BSc <sup>20</sup>,

1221 Mireille Fragakis HND <sup>20</sup>, Dr Katerina Galai PhD <sup>20, 70</sup>, Dr Andrew Jermy PhD <sup>20</sup>, Sarah

1222 Judges BA <sup>20</sup>, Georgina M McManus BSc <sup>20</sup>, Kim S Smith <sup>20</sup>, Dr Elaine Westwick PhD <sup>20</sup>, Dr

1223 Stephen W Attwood PhD <sup>23</sup>, Dr Frances Bolt PhD <sup>38, 57</sup>, Dr Alisha Davies PhD <sup>74</sup>, Elen De

1224 Lacy MPH <sup>74</sup>, Fatima Downing <sup>74</sup>, Sue Edwards <sup>74</sup>, Lizzie Meadows MA <sup>75</sup>, Sarah Jeremiah

1225 MSc <sup>97</sup>, Dr Nikki Smith PhD <sup>109</sup> and Luke Foulser <sup>116</sup>

1226

1227 Samples and logistics:

1228 Dr Themoula Charalampous PhD <sup>12, 46</sup>, Amita Patel BSc <sup>12</sup>, Dr Louise Berry PhD <sup>15</sup>, Dr Tim

1229 Boswell PhD <sup>15</sup>, Dr Vicki M Fleming PhD <sup>15</sup>, Dr Hannah C Howson-Wells PhD <sup>15</sup>, Dr Amelia

1230 Joseph PhD <sup>15</sup>, Manjinder Khakh <sup>15</sup>, Dr Michelle M Lister PhD <sup>15</sup>, Paul W Bird MSc, MRes <sup>16</sup>,

1231 Karlie Fallon <sup>16</sup>, Thomas Helmer <sup>16</sup>, Dr Claire L McMurray PhD <sup>16</sup>, Mina Odedra BSc <sup>16</sup>,

1232 Jessica Shaw BSc <sup>16</sup>, Dr Julian W Tang PhD <sup>16</sup>, Nicholas J Willford MSc <sup>16</sup>, Victoria Blakey

1233 BSc <sup>17</sup>, Dr Veena Raviprakash MD <sup>17</sup>, Nicola Sheriff BSc <sup>17</sup>, Lesley-Anne Williams BSc <sup>17</sup>,

1234 Theresa Feltwell MSc <sup>20</sup>, Dr Luke Bedford PhD <sup>26</sup>, Dr James S Cargill PhD <sup>27</sup>, Warwick

1235 Hughes MSc <sup>27</sup>, Dr Jonathan Moore MD <sup>28</sup>, Susanne Stonehouse BSc <sup>28</sup>, Laura Atkinson

1236 MSc <sup>29</sup>, Jack CD Lee MSc <sup>29</sup>, Dr Divya Shah PhD <sup>29</sup>, Adela Alcolea-Medina Clinical scientist

1237 <sup>32, 112</sup>, Natasha Ohemeng-Kumi MSc <sup>32, 112</sup>, John Ramble MSc <sup>32, 112</sup>, Jasveen Sehmi MSc <sup>32</sup>,

1238 <sup>112</sup>, Dr Rebecca Williams BMBS <sup>33</sup>, Wendy Chatterton MSc <sup>34</sup>, Monika Pusok MSc <sup>34</sup>, William

1239 Everson MSc <sup>37</sup>, Anibolina Castigador IBMS HCPC <sup>44</sup>, Emily Macnaughton FRCPATH <sup>44</sup>, Dr

1240 Kate El Bouzidi MRCP <sup>45</sup>, Dr Temi Lampejo FRCPATH <sup>45</sup>, Dr Malur Sudhanva FRCPATH <sup>45</sup>,

1241 Cassie Breen BSc <sup>47</sup>, Dr Graciela Sluga MD, MSc <sup>48</sup>, Dr Shazaad SY Ahmad MSc <sup>49, 70</sup>, Dr

1242 Ryan P George PhD <sup>49</sup>, Dr Nicholas W Machin MSc <sup>49, 70</sup>, Debbie Binns BSc <sup>50</sup>, Victoria

1243 James BSc <sup>50</sup>, Dr Rachel Blacow MBCHB <sup>55</sup>, Dr Lindsay Coupland PhD <sup>58</sup>, Dr Louise Smith

1244 PhD <sup>59</sup>, Dr Edward Barton MD <sup>60</sup>, Debra Padgett BSc <sup>60</sup>, Garren Scott BSc <sup>60</sup>, Dr Aidan Cross



1245 MBCHB <sup>61</sup>, Dr Mariyam Mirfenderesky FRCPATH <sup>61</sup>, Jane Greenaway MSc <sup>62</sup>, Kevin Cole <sup>64</sup>,  
1246 Phillip Clarke <sup>67</sup>, Nichola Duckworth <sup>67</sup>, Sarah Walsh <sup>67</sup>, Kelly Bicknell <sup>68</sup>, Robert Impey MSc  
1247 <sup>68</sup>, Dr Sarah Wyllie PhD <sup>68</sup>, Richard Hopes <sup>70</sup>, Dr Chloe Bishop PhD <sup>72</sup>, Dr Vicki Chalker PhD  
1248 <sup>72</sup>, Dr Ian Harrison PhD <sup>72</sup>, Laura Gifford MSc <sup>74</sup>, Dr Zoltan Molnar PhD <sup>77</sup>, Dr Cressida  
1249 Auckland FRCPATH <sup>79</sup>, Dr Cariad Evans PhD <sup>85, 109</sup>, Dr Kate Johnson PhD <sup>85, 109</sup>, Dr David G  
1250 Partridge FRCP, FRCPATH <sup>85, 109</sup>, Dr Mohammad Raza PhD <sup>85, 109</sup>, Paul Baker MD <sup>86</sup>, Prof  
1251 Stephen Bonner PhD <sup>86</sup>, Sarah Essex <sup>86</sup>, Leanne J Murray <sup>86</sup>, Andrew I Lawton MSc <sup>87</sup>, Dr  
1252 Shirelle Burton-Fanning MD <sup>89</sup>, Dr Brendan Al Payne MD <sup>89</sup>, Dr Sheila Waugh MD <sup>89</sup>, Andrea  
1253 N Gomes MSc <sup>91</sup>, Maimuna Kimuli MSc <sup>91</sup>, Darren R Murray MSc <sup>91</sup>, Paula Ashfield MSc <sup>92</sup>,  
1254 Dr Donald Dobie MBCHB <sup>92</sup>, Dr Fiona Ashford PhD <sup>93</sup>, Dr Angus Best PhD <sup>93</sup>, Dr Liam  
1255 Crawford PhD <sup>93</sup>, Dr Nicola Cumley PhD <sup>93</sup>, Dr Megan Mayhew PhD <sup>93</sup>, Dr Oliver Megram  
1256 PhD <sup>93</sup>, Dr Jeremy Mirza PhD <sup>93</sup>, Dr Emma Moles-Garcia PhD <sup>93</sup>, Dr Benita Percival PhD <sup>93</sup>,  
1257 Megan Driscoll BSc <sup>96</sup>, Leah Ensell BSc <sup>96</sup>, Dr Helen L Lowe PhD <sup>96</sup>, Laurentiu Maftei BSc <sup>96</sup>,  
1258 Matteo Mondani MSc <sup>96</sup>, Nicola J Chaloner BSc <sup>99</sup>, Benjamin J Cogger BSc <sup>99</sup>, Lisa J Easton  
1259 MSc <sup>99</sup>, Hannah Huckson BSc <sup>99</sup>, Jonathan Lewis MSc, PgD, FIBMS <sup>99</sup>, Sarah Lowdon BSc  
1260 <sup>99</sup>, Cassandra S Malone MSc <sup>99</sup>, Florence Munemo BSc <sup>99</sup>, Manasa Mutingwende MSc <sup>99</sup>,  
1261 Roberto Nicodemi BSc <sup>99</sup>, Olga Podplomyk FD <sup>99</sup>, Thomas Somassa BSc <sup>99</sup>, Dr Andrew  
1262 Beggs PhD <sup>100</sup>, Dr Alex Richter PhD <sup>100</sup>, Claire Cormie <sup>102</sup>, Joana Dias MSc <sup>102</sup>, Sally Forrest  
1263 BSc <sup>102</sup>, Dr Ellen E Higginson PhD <sup>102</sup>, Mailis Maes MPhil <sup>102</sup>, Jamie Young BSc <sup>102</sup>, Dr Rose  
1264 K Davidson PhD <sup>103</sup>, Kathryn A Jackson MSc <sup>107</sup>, Dr Lance Turtle PhD, MRCP <sup>107</sup>, Dr  
1265 Alexander J Keeley MRCP <sup>109</sup>, Prof Jonathan Ball PhD <sup>113</sup>, Timothy Byaruhanga MSc <sup>113</sup>, Dr  
1266 Joseph G Chappell PhD <sup>113</sup>, Jayasree Dey MSc <sup>113</sup>, Jack D Hill MSc <sup>113</sup>, Emily J Park MSc  
1267 <sup>113</sup>, Arezou Fanaie MSc <sup>114</sup>, Rachel A Hilson MSc <sup>114</sup>, Geraldine Yaze MSc <sup>114</sup> and Stephanie  
1268 Lo <sup>116</sup>  
1269  
1270 Sequencing and analysis:  
1271 Safiah Afifi BSc <sup>10</sup>, Robert Beer BSc <sup>10</sup>, Joshua Maksimovic FD <sup>10</sup>, Kathryn McCluggage  
1272 Masters <sup>10</sup>, Karla Spellman FD <sup>10</sup>, Catherine Bresner BSc <sup>11</sup>, William Fuller BSc <sup>11</sup>, Dr Angela  
1273 Marchbank BSc <sup>11</sup>, Trudy Workman HNC <sup>11</sup>, Dr Ekaterina Shelest PhD <sup>13, 81</sup>, Dr Johnny  
1274 Debebe PhD <sup>18</sup>, Dr Fei Sang PhD <sup>18</sup>, Dr Marina Escalera Zamudio PhD <sup>23</sup>, Dr Sarah Francois  
1275 PhD <sup>23</sup>, Bernardo Gutierrez MSc <sup>23</sup>, Dr Tetyana I Vasylyeva DPhil <sup>23</sup>, Dr Flavia Flaviani PhD  
1276 <sup>31</sup>, Dr Manon Ragonnet-Cronin PhD <sup>39</sup>, Dr Katherine L Smollett PhD <sup>42</sup>, Alice Broos BSc <sup>53</sup>,  
1277 Daniel Mair BSc <sup>53</sup>, Jenna Nichols BSc <sup>53</sup>, Dr Kyriaki Nomikou PhD <sup>53</sup>, Dr Lily Tong PhD <sup>53</sup>,  
1278 Ioulia Tsatsani MSc <sup>53</sup>, Prof Sarah O'Brien PhD <sup>54</sup>, Prof Steven Rushton PhD <sup>54</sup>, Dr Roy  
1279 Sanderson PhD <sup>54</sup>, Dr Jon Perkins MBCHB <sup>55</sup>, Seb Cotton MSc <sup>56</sup>, Abbie Gallagher BSc <sup>56</sup>,  
1280 Dr Elias Allara MD, PhD <sup>70, 102</sup>, Clare Pearson MSc <sup>70, 102</sup>, Dr David Bibby PhD <sup>72</sup>, Dr Gavin  
1281 Dabrera PhD <sup>72</sup>, Dr Nicholas Ellaby PhD <sup>72</sup>, Dr Eileen Gallagher PhD <sup>72</sup>, Dr Jonathan Hubb  
1282 PhD <sup>72</sup>, Dr Angie Lackenby PhD <sup>72</sup>, Dr David Lee PhD <sup>72</sup>, Nikos Manesis <sup>72</sup>, Dr Tamyo Mbisa  
1283 PhD <sup>72</sup>, Dr Steven Platt PhD <sup>72</sup>, Katherine A Twohig <sup>72</sup>, Dr Mari Morgan PhD <sup>74</sup>, Alp Aydin  
1284 MSci <sup>75</sup>, David J Baker BEng <sup>75</sup>, Dr Ebenezer Foster-Nyarko PhD <sup>75</sup>, Dr Sophie J Prosolek  
1285 PhD <sup>75</sup>, Steven Rudder <sup>75</sup>, Chris Baxter BSc <sup>77</sup>, Sílvia F Carvalho MSc <sup>77</sup>, Dr Deborah Lavin  
1286 PhD <sup>77</sup>, Dr Arun Mariappan PhD <sup>77</sup>, Dr Clara Radulescu PhD <sup>77</sup>, Dr Aditi Singh PhD <sup>77</sup>, Miao  
1287 Tang MD <sup>77</sup>, Helen Morcette BSc <sup>79</sup>, Nadua Bayzid BSc <sup>96</sup>, Marius Cotic MSc <sup>96</sup>, Dr Carlos E  
1288 Balcazar PhD <sup>104</sup>, Dr Michael D Gallagher PhD <sup>104</sup>, Dr Daniel Maloney PhD <sup>104</sup>, Thomas D  
1289 Stanton BSc <sup>104</sup>, Dr Kathleen A Williamson PhD <sup>104</sup>, Dr Robin Manley PhD <sup>105</sup>, Michelle L  
1290 Michelsen BSc <sup>105</sup>, Dr Christine M Sambles PhD <sup>105</sup>, Dr David J Studholme PhD <sup>105</sup>, Joanna  
1291 Warwick-Dugdale BSc <sup>105</sup>, Richard Eccles MSc <sup>107</sup>, Matthew Gemmell MSc <sup>107</sup>, Dr Richard  
1292 Gregory PhD <sup>107</sup>, Dr Margaret Hughes PhD <sup>107</sup>, Charlotte Nelson MSc <sup>107</sup>, Dr Lucille Rainbow

1293 PhD <sup>107</sup>, Dr Edith E Vamos PhD <sup>107</sup>, Hermione J Webster BSc <sup>107</sup>, Dr Mark Whitehead PhD  
1294 <sup>107</sup>, Claudia Wierzbicki BSc <sup>107</sup>, Dr Adrienn Angyal PhD <sup>109</sup>, Dr Luke R Green PhD <sup>109</sup>, Dr Max  
1295 Whiteley PhD <sup>109</sup>, Emma Betteridge BSc <sup>116</sup>, Dr Iraad F Bronner PhD <sup>116</sup>, Ben W Farr BSc <sup>116</sup>,  
1296 Scott Goodwin MSc <sup>116</sup>, Dr Stefanie V Lensing PhD <sup>116</sup>, Shane A McCarthy <sup>116, 102</sup>, Dr Michael  
1297 A Quail PhD <sup>116</sup>, Diana Rajan MSc <sup>116</sup>, Dr Nicholas M Redshaw PhD <sup>116</sup>, Carol Scott <sup>116</sup>,  
1298 Lesley Shirley MSc <sup>116</sup> and Scott AJ Thurston BSc <sup>116</sup>

1299

1300 Software and analysis tools:

1301 Dr Will Rowe PhD<sup>43</sup>, Amy Gaskin MSc <sup>74</sup>, Dr Thanh Le-Viet PhD <sup>75</sup>, James Bonfield BSc <sup>116</sup>,  
1302 Jennifer Liddle <sup>116</sup> and Andrew Whitwham BSc <sup>116</sup>

1303

1304 1 Barking, Havering and Redbridge University Hospitals NHS Trust, 2 Barts Health NHS Trust, 3  
1305 Belfast Health & Social Care Trust, 4 Betsi Cadwaladr University Health Board, 5 Big Data Institute,  
1306 Nuffield Department of Medicine, University of Oxford, 6 Blackpool Teaching Hospitals NHS  
1307 Foundation Trust, 7 Bournemouth University, 8 Cambridge Stem Cell Institute, University of  
1308 Cambridge, 9 Cambridge University Hospitals NHS Foundation Trust, 10 Cardiff and Vale University  
1309 Health Board, 11 Cardiff University, 12 Centre for Clinical Infection and Diagnostics Research,  
1310 Department of Infectious Diseases, Guy's and St Thomas' NHS Foundation Trust, 13 Centre for  
1311 Enzyme Innovation, University of Portsmouth, 14 Centre for Genomic Pathogen Surveillance,  
1312 University of Oxford, 15 Clinical Microbiology Department, Queens Medical Centre, Nottingham  
1313 University Hospitals NHS Trust, 16 Clinical Microbiology, University Hospitals of Leicester NHS Trust,  
1314 17 County Durham and Darlington NHS Foundation Trust, 18 Deep Seq, School of Life Sciences,  
1315 Queens Medical Centre, University of Nottingham, 19 Department of Infectious Diseases and  
1316 Microbiology, Cambridge University Hospitals NHS Foundation Trust, 20 Department of Medicine,  
1317 University of Cambridge, 21 Department of Microbiology, Kettering General Hospital, 22 Department  
1318 of Microbiology, South West London Pathology, 23 Department of Zoology, University of Oxford, 24  
1319 Division of Virology, Department of Pathology, University of Cambridge, 25 East Kent Hospitals  
1320 University NHS Foundation Trust, 26 East Suffolk and North Essex NHS Foundation Trust, 27 East  
1321 Sussex Healthcare NHS Trust, 28 Gateshead Health NHS Foundation Trust, 29 Great Ormond Street  
1322 Hospital for Children NHS Foundation Trust, 30 Great Ormond Street Institute of Child Health (GOS  
1323 ICH), University College London (UCL), 31 Guy's and St. Thomas' Biomedical Research Centre, 32  
1324 Guy's and St. Thomas' NHS Foundation Trust, 33 Hampshire Hospitals NHS Foundation Trust, 34  
1325 Health Services Laboratories, 35 Heartlands Hospital, Birmingham, 36 Hub for Biotechnology in the  
1326 Built Environment, Northumbria University, 37 Hull University Teaching Hospitals NHS Trust, 38  
1327 Imperial College Healthcare NHS Trust, 39 Imperial College London, 40 Infection Care Group, St  
1328 George's University Hospitals NHS Foundation Trust, 41 Institute for Infection and Immunity, St  
1329 George's University of London, 42 Institute of Biodiversity, Animal Health & Comparative Medicine, 43  
1330 Institute of Microbiology and Infection, University of Birmingham, 44 Isle of Wight NHS Trust, 45  
1331 King's College Hospital NHS Foundation Trust, 46 King's College London, 47 Liverpool Clinical  
1332 Laboratories, 48 Maidstone and Tunbridge Wells NHS Trust, 49 Manchester University NHS  
1333 Foundation Trust, 50 Microbiology Department, Buckinghamshire Healthcare NHS Trust, 51  
1334 Microbiology, Royal Oldham Hospital, 52 MRC Biostatistics Unit, University of Cambridge, 53 MRC-  
1335 University of Glasgow Centre for Virus Research, 54 Newcastle University, 55 NHS Greater Glasgow  
1336 and Clyde, 56 NHS Lothian, 57 NIHR Health Protection Research Unit in HCAI and AMR, Imperial  
1337 College London, 58 Norfolk and Norwich University Hospitals NHS Foundation Trust, 59 Norfolk  
1338 County Council, 60 North Cumbria Integrated Care NHS Foundation Trust, 61 North Middlesex  
1339 University Hospital NHS Trust, 62 North Tees and Hartlepool NHS Foundation Trust, 63 North West  
1340 London Pathology, 64 Northumbria Healthcare NHS Foundation Trust, 65 Northumbria University, 66  
1341 NU-OMICS, Northumbria University, 67 Path Links, Northern Lincolnshire and Goole NHS Foundation  
1342 Trust, 68 Portsmouth Hospitals University NHS Trust, 69 Public Health Agency, Northern Ireland, 70  
1343 Public Health England, 71 Public Health England, Cambridge, 72 Public Health England, Colindale,

1344 73 Public Health Scotland, 74 Public Health Wales, 75 Quadram Institute Bioscience, 76 Queen  
1345 Elizabeth Hospital, Birmingham, 77 Queen's University Belfast, 78 Royal Brompton and Harefield  
1346 Hospitals, 79 Royal Devon and Exeter NHS Foundation Trust, 80 Royal Free London NHS  
1347 Foundation Trust, 81 School of Biological Sciences, University of Portsmouth, 82 School of Health  
1348 Sciences, University of Southampton, 83 School of Medicine, University of Southampton, 84 School of  
1349 Pharmacy & Biomedical Sciences, University of Portsmouth, 85 Sheffield Teaching Hospitals NHS  
1350 Foundation Trust, 86 South Tees Hospitals NHS Foundation Trust, 87 Southwest Pathology Services,  
1351 88 Swansea University, 89 The Newcastle upon Tyne Hospitals NHS Foundation Trust, 90 The  
1352 Queen Elizabeth Hospital King's Lynn NHS Foundation Trust, 91 The Royal Marsden NHS  
1353 Foundation Trust, 92 The Royal Wolverhampton NHS Trust, 93 Turnkey Laboratory, University of  
1354 Birmingham, 94 University College London Division of Infection and Immunity, 95 University College  
1355 London Hospital Advanced Pathogen Diagnostics Unit, 96 University College London Hospitals NHS  
1356 Foundation Trust, 97 University Hospital Southampton NHS Foundation Trust, 98 University Hospitals  
1357 Dorset NHS Foundation Trust, 99 University Hospitals Sussex NHS Foundation Trust, 100 University  
1358 of Birmingham, 101 University of Brighton, 102 University of Cambridge, 103 University of East  
1359 Anglia, 104 University of Edinburgh, 105 University of Exeter, 106 University of Kent, 107 University of  
1360 Liverpool, 108 University of Oxford, 109 University of Sheffield, 110 University of Southampton, 111  
1361 University of St Andrews, 112 Viapath, Guy's and St Thomas' NHS Foundation Trust, and King's  
1362 College Hospital NHS Foundation Trust, 113 Virology, School of Life Sciences, Queens Medical  
1363 Centre, University of Nottingham, 114 Watford General Hospital, 115 Wellcome Centre for Human  
1364 Genetics, Nuffield Department of Medicine, University of Oxford, 116 Wellcome Sanger Institute, 117  
1365 West of Scotland Specialist Virology Centre, NHS Greater Glasgow and Clyde, 118 Whittington  
1366 Health NHS Trust  
1367
